# Supplementary material for: Synthesis and singlet oxygen generation of pyrazinoporphyrazines containing dendrimeric aryl substituents
Source: Royal Society of Chemistry journal article supplement (doi:10.1039/c6nj03886g), 2017-01-01
Supplement: c6nj03886g1.pdf [file c6nj03886g1.pdf]

*Supplementary data for*

**Synthesis and singlet oxygen generation of pyrazinoporphyrazines containing dendrimeric aryl  
substituents**

Adam Tillo<sup>a</sup>, Dariusz T. Mlynarczyk<sup>a</sup>, Lukasz Popenda<sup>b</sup>, Barbara Wicher<sup>a</sup>, Michal Kryjewski<sup>\*c</sup>, Wojciech Szczolko<sup>a</sup>, Stefan Jurga<sup>b,d</sup>, Jadwiga Mielcarek<sup>c</sup>, Maria Gdaniec<sup>e</sup>, Tomasz Goslinski<sup>a</sup>, Ewa Tykarska<sup>\*a</sup>

a. Department of Chemical Technology of Drugs, Poznan University of Medical Sciences, Grunwaldzka 6, 60-780 Poznan, Poland, E-mail: etykarsk@ump.edu.pl

b. NanoBioMedical Centre, Adam Mickiewicz University, Umultowska 85, 61-614 Poznan, Poland

c. Department of Inorganic and Analytical Chemistry, Poznan University of Medical Sciences, Grunwaldzka 6, 60-780 Poznan, Poland, E-mail: mkryjewski@ump.edu.pl

d. Department of Macromolecular Physics, Faculty of Physics, Adam Mickiewicz University, Umultowska 85, 61-614 Poznan, Poland

e. Faculty of Chemistry, Adam Mickiewicz University, Umultowska 89b, 61-614 Poznan, Poland

\*Corresponding authors. Tel. +48 61 854 6632; fax. +48 61 854 6639; e-mail address: etykarsk@ump.edu.pl, (E. Tykarska); Tel. +48 61 854 6606; fax. +48 61 854 6609; e-mail address: mkryjewski@ump.edu.pl (M. Kryjewski)

## Table of Contents

### **Spectroscopic data**

|                             |           |
|-----------------------------|-----------|
| Compound <b>5b</b> .....    | <b>3</b>  |
| Compound <b>5c</b> .....    | <b>5</b>  |
| Porphyrazine <b>6</b> ..... | <b>7</b>  |
| Porphyrazine <b>7</b> ..... | <b>10</b> |
| Porphyrazine <b>8</b> ..... | <b>13</b> |
| Porphyrazine <b>9</b> ..... | <b>16</b> |

|                         |           |
|-------------------------|-----------|
| <b>X-ray data</b> ..... | <b>19</b> |
|-------------------------|-----------|

### **HPLC analysis of purity**

|                                       |           |
|---------------------------------------|-----------|
| Purity of porphyrazine <b>7</b> ..... | <b>23</b> |
| Purity of porphyrazine <b>9</b> ..... | <b>24</b> |

|                                  |           |
|----------------------------------|-----------|
| <b>Aggregation studies</b> ..... | <b>25</b> |
|----------------------------------|-----------|

|                                                 |           |
|-------------------------------------------------|-----------|
| <b>Singlet oxygen generation efficacy</b> ..... | <b>27</b> |
|-------------------------------------------------|-----------|

|                                   |           |
|-----------------------------------|-----------|
| <b>Fluorescence spectra</b> ..... | <b>29</b> |
|-----------------------------------|-----------|

|                                                                                                    |           |
|----------------------------------------------------------------------------------------------------|-----------|
| <b>Synthetical approaches towards porphyrazines bearing 4-(benzyloxy)phenyl substituents</b> ..... | <b>31</b> |
|----------------------------------------------------------------------------------------------------|-----------|

NMR data of **5b**

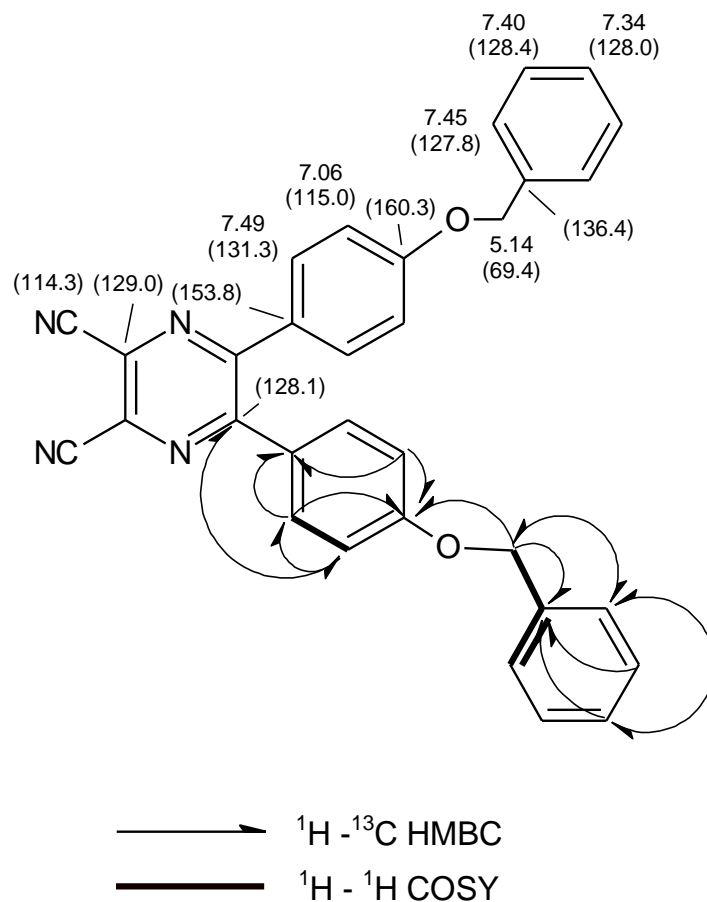

**Fig. S1.**  $^1\text{H}$  and ( $^{13}\text{C}$ ) chemical shift values [ppm] of **5b**. Key  $^1\text{H} - ^{13}\text{C}$  HMBC and  $^1\text{H} - ^1\text{H}$  COSY correlations are marked with arrows and bold lines, respectively.

**Table S1.**  $^1\text{H}$  and  $^{13}\text{C}$  NMR data obtained for **5b** including key correlations determined from  $^1\text{H} - ^{13}\text{C}$  HSQC and  $^1\text{H} - ^{13}\text{C}$  HMBC spectra.

| $\delta_{\text{H}}$ (ppm)                                               | Multiplicity<br>( $J_{\text{H-H}}$ in Hz) | $^1\text{H} - ^{13}\text{C}$ HSQC<br>$\delta_{\text{C}}$ (ppm) | $^1\text{H} - ^{13}\text{C}$ HMBC<br>$\delta_{\text{C}}$ (ppm) |       |             |
|-------------------------------------------------------------------------|-------------------------------------------|----------------------------------------------------------------|----------------------------------------------------------------|-------|-------------|
| 7.49                                                                    | d (7.5)                                   | 131.3                                                          | 115.0                                                          | 153.8 | 160.3       |
| 7.45                                                                    | d (7.5)                                   | 127.8                                                          | 69.4                                                           | 128.0 |             |
| 7.40                                                                    | t(7.5)                                    | 128.4                                                          | 136.4                                                          |       |             |
| 7.34                                                                    | t (7.5)                                   | 128.0                                                          | 127.8                                                          | 136.4 |             |
| 7.06                                                                    | d (7.0)                                   | 115.0                                                          | 128.1                                                          | 131.3 | 153.8 160.3 |
| 5.14                                                                    | s                                         | 69.4                                                           | 127.8                                                          | 136.4 | 160.3       |
| Quaternary carbon atoms (ppm): 114.3, 128.1, 129.0, 136.4, 153.8, 160.3 |                                           |                                                                |                                                                |       |             |

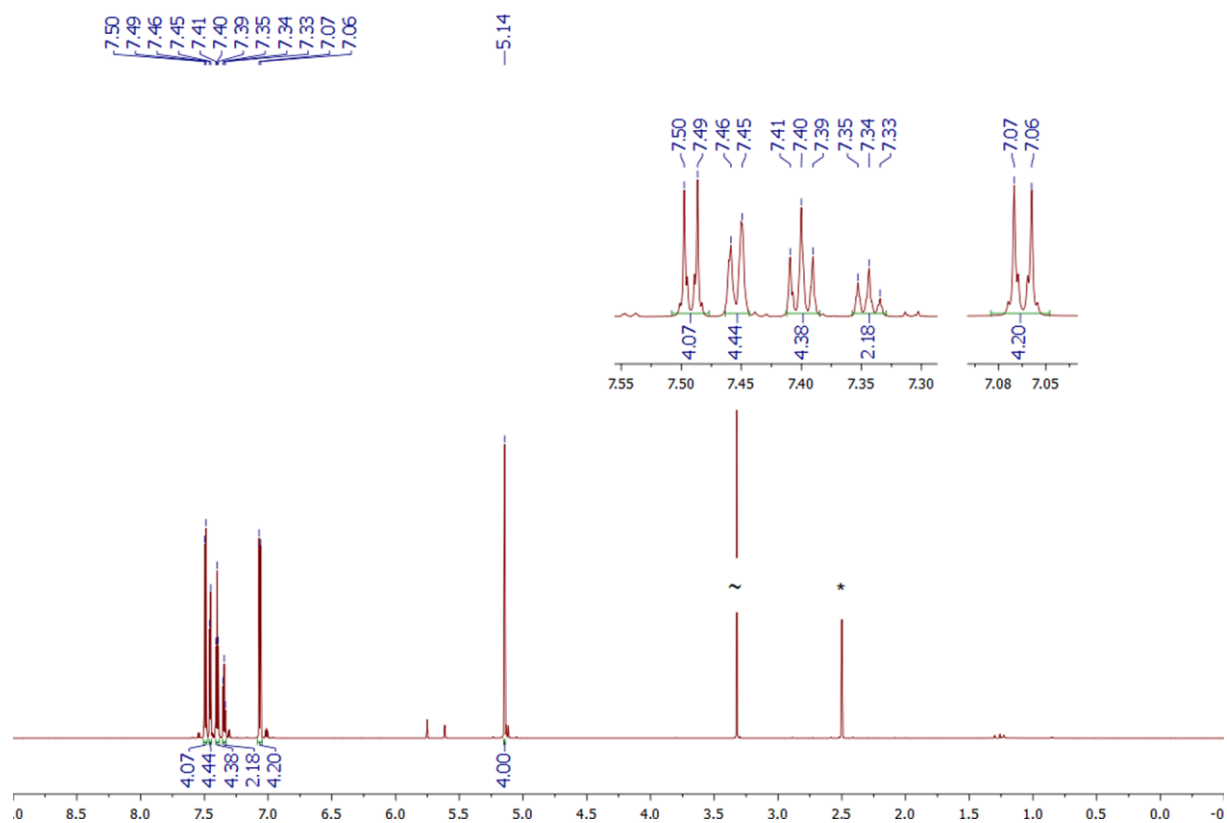

**Fig. S2.**  $^1\text{H}$  NMR spectrum of **5b** (800 MHz,  $\text{DMSO-}d_6$ , 298 K). The symbols \* and ~ indicate  $\text{DMSO-}d_6$  and water residual peaks, respectively.

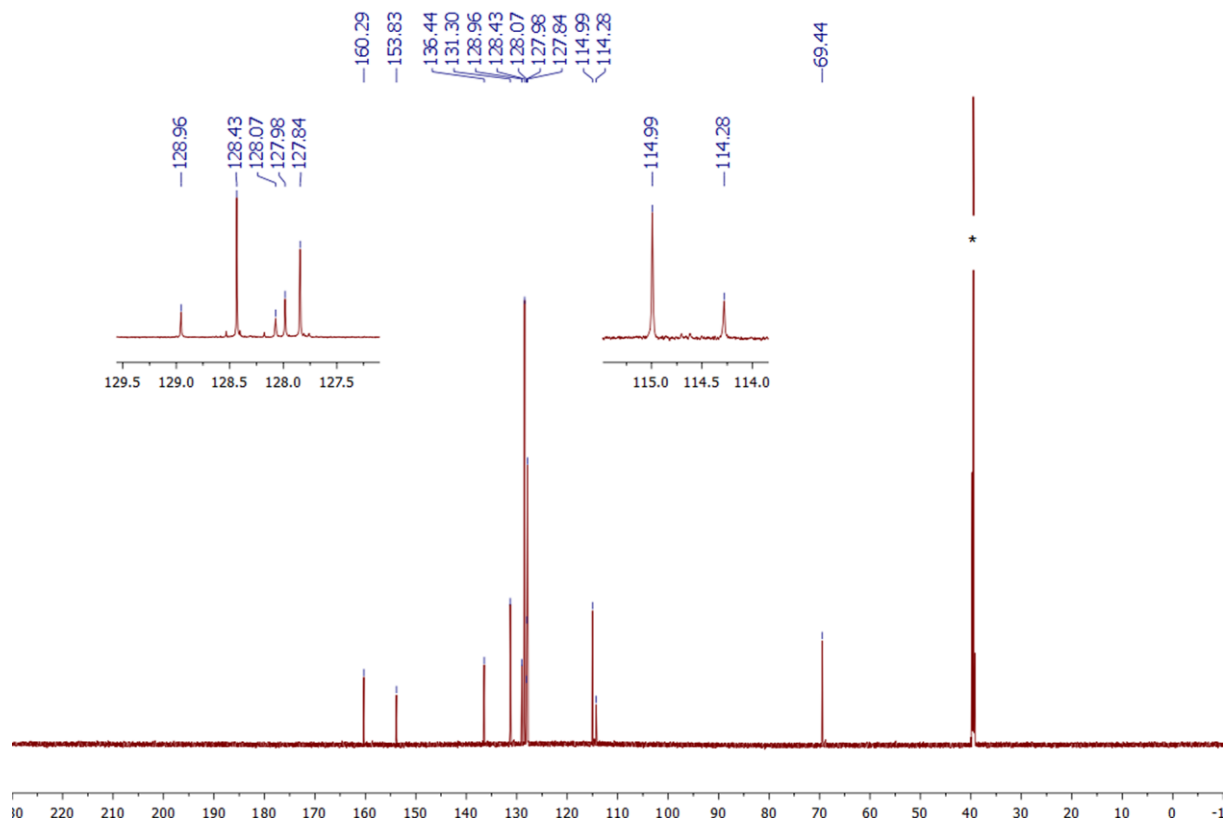

**Fig. S3.**  $^{13}\text{C}$  NMR spectrum recorded for **5b** (201 MHz,  $\text{DMSO-}d_6$ , 298 K). The symbol \* indicates  $\text{DMSO-}d_6$  peak.

NMR data of **5c**

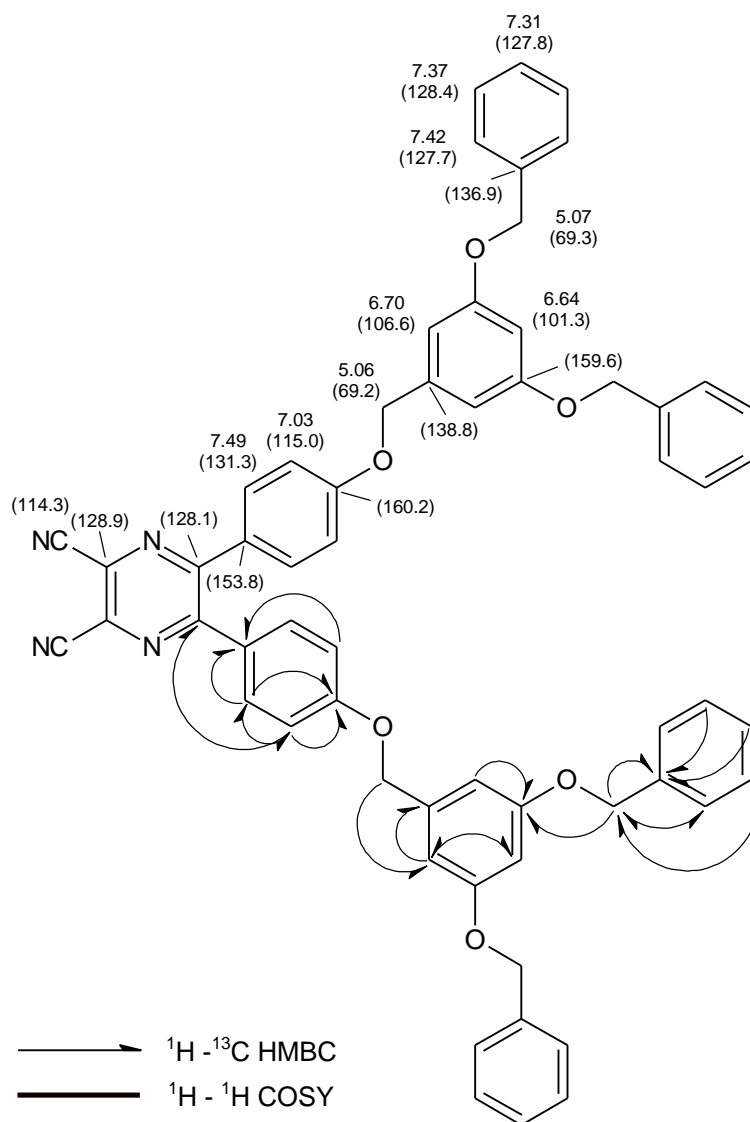

**Fig. S4.**  $^1\text{H}$  and ( $^{13}\text{C}$ ) chemical shift values [ppm] of **5c**. Key  $^1\text{H}$ - $^{13}\text{C}$  HMBC and  $^1\text{H}$ - $^1\text{H}$  COSY correlations are marked with arrows and bold lines, respectively.

**Table. S2.**  $^1\text{H}$  and  $^{13}\text{C}$  NMR data obtained for **5c** including key correlations determined from  $^1\text{H}$ - $^{13}\text{C}$  HSQC and  $^1\text{H}$ - $^{13}\text{C}$  HMBC spectra.

| $\delta_{\text{H}}$ (ppm)                                                             | Multiplicity<br>( $J_{\text{H-H}}$ in Hz) | $^1\text{H}$ - $^{13}\text{C}$ HSQC<br>$\delta_{\text{C}}$ (ppm) | $^1\text{H}$ - $^{13}\text{C}$ HMBC<br>$\delta_{\text{C}}$ (ppm) |       |             |
|---------------------------------------------------------------------------------------|-------------------------------------------|------------------------------------------------------------------|------------------------------------------------------------------|-------|-------------|
| 7.49                                                                                  | d (7.5)                                   | 131.3                                                            | 115.0                                                            | 153.8 | 160.2       |
| 7.42                                                                                  | d (7.5)                                   | 127.7                                                            | 69.3                                                             |       |             |
| 7.37                                                                                  | t (7.5)                                   | 128.4                                                            | 69.3                                                             | 136.9 |             |
| 7.31                                                                                  | m                                         | 127.8                                                            | 136.9                                                            |       |             |
| 7.03                                                                                  | d (7.0)                                   | 115.0                                                            | 128.1                                                            | 131.3 | 153.8 160.2 |
| 6.70                                                                                  | d (2.4)                                   | 106.6                                                            | 101.3                                                            | 138.8 | 159.6       |
| 6.64                                                                                  | t (2.4)                                   | 101.3                                                            | 106.6                                                            |       |             |
| 5.07                                                                                  | s                                         | 69.3                                                             | 127.7                                                            | 136.9 | 159.6       |
| 5.06                                                                                  | s                                         | 69.2                                                             | 106.6                                                            |       |             |
| Quaternary carbon atoms (ppm): 114.3, 128.1, 128.9, 136.9, 138.8, 153.8, 159.6, 160.2 |                                           |                                                                  |                                                                  |       |             |

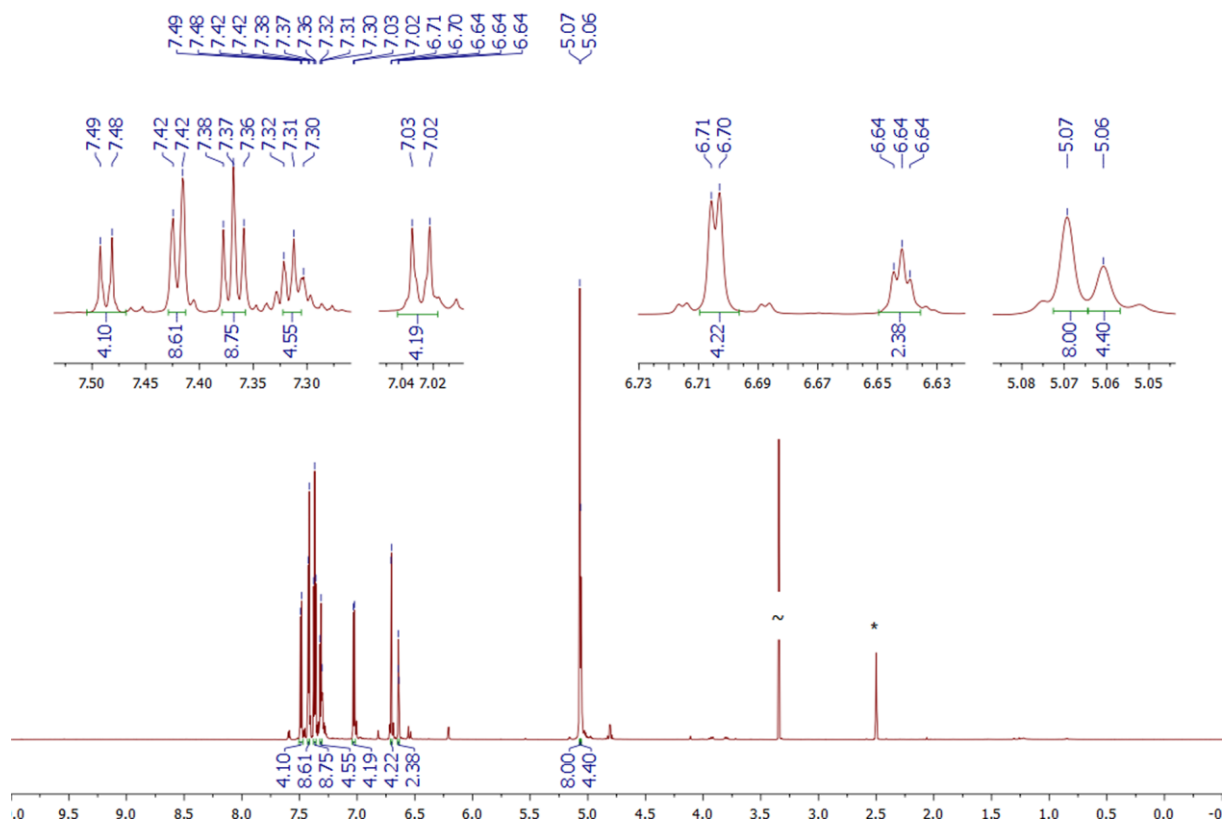

**Fig. S5.**  $^1\text{H}$  NMR spectrum of **5c** (800 MHz,  $\text{DMSO-}d_6$ , 298 K). The symbols \* and ~ indicate  $\text{DMSO-}d_6$  and water residual peaks, respectively.

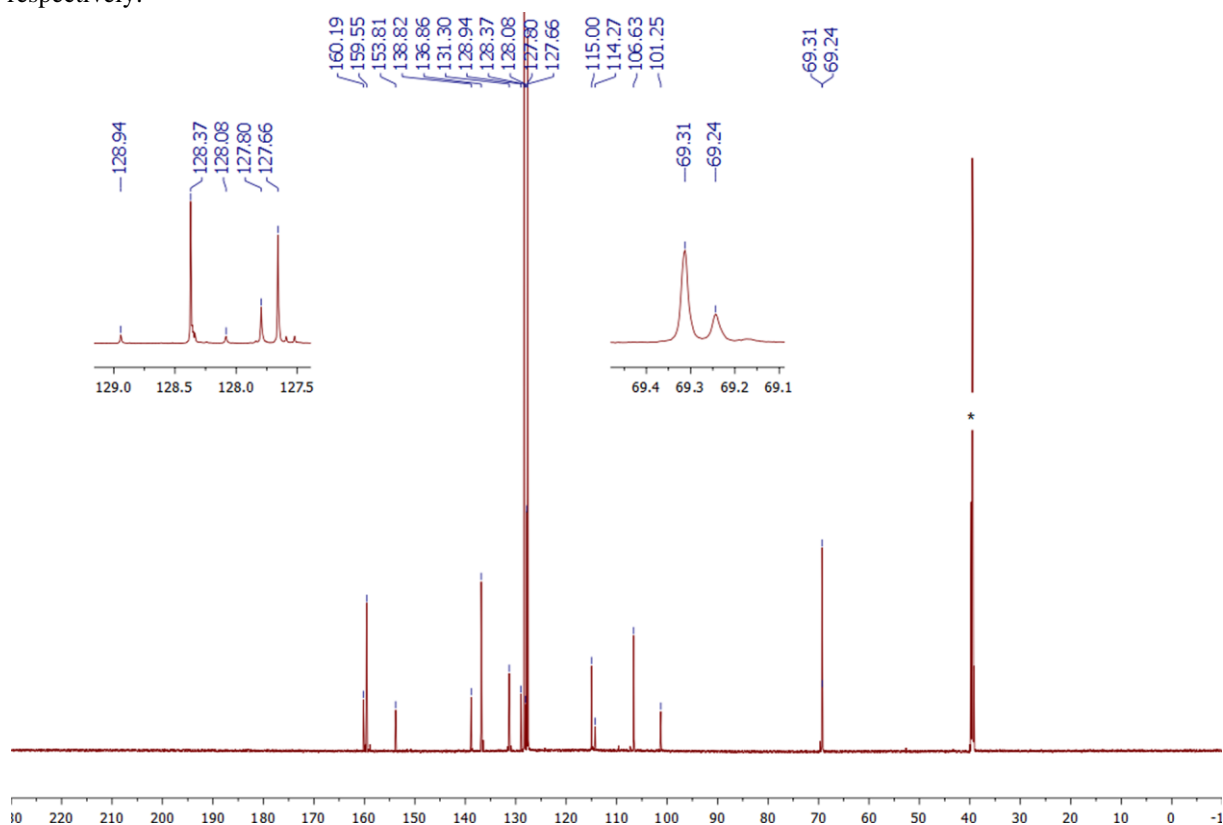

**Fig. S6.**  $^{13}\text{C}$  NMR spectrum recorded for **5c** (201 MHz,  $\text{DMSO-}d_6$ , 298 K). The symbol \* indicates  $\text{DMSO-}d_6$  peak.

NMR data of **6**

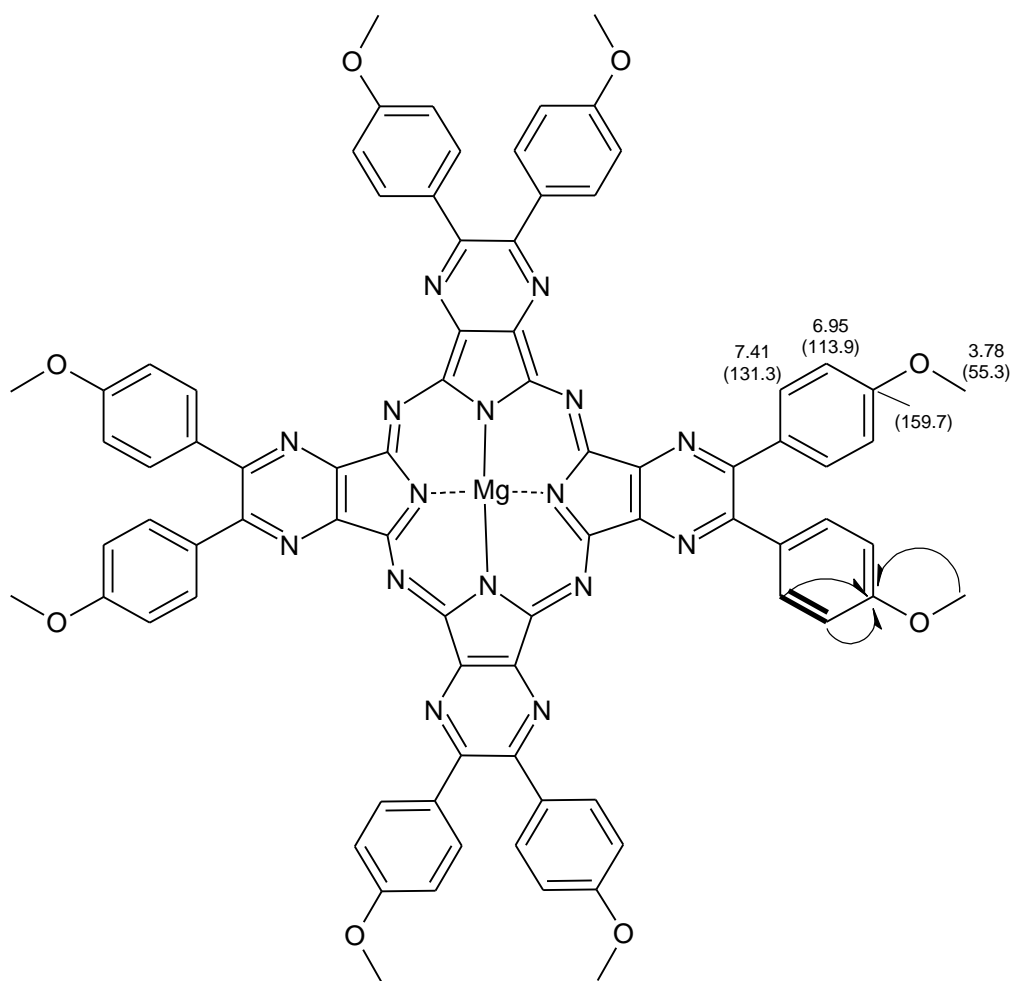

**Fig. S7.**  $^1\text{H}$  and ( $^{13}\text{C}$ ) chemical shift values [ppm] of **6**. Key  $^1\text{H}$ - $^{13}\text{C}$  HMBC and  $^1\text{H}$ - $^1\text{H}$  COSY correlations are marked with arrows and bold lines, respectively.

**Table S3.**  $^1\text{H}$  and  $^{13}\text{C}$  NMR data obtained for **6** including key correlations determined from  $^1\text{H}$ - $^{13}\text{C}$  HSQC and  $^1\text{H}$ - $^{13}\text{C}$  HMBC spectra.

| $\delta_{\text{H}}$ (ppm)            | Multiplicity<br>( $J_{\text{H-H}}$ in Hz) | $^1\text{H}$ - $^{13}\text{C}$ HSQC<br>$\delta_{\text{C}}$ (ppm) | $^1\text{H}$ - $^{13}\text{C}$ HMBC<br>$\delta_{\text{C}}$ (ppm) |
|--------------------------------------|-------------------------------------------|------------------------------------------------------------------|------------------------------------------------------------------|
| 7.41                                 | m                                         | 131.3                                                            | 159.7                                                            |
| 6.95                                 | m                                         | 113.9                                                            | 159.7                                                            |
| 3.78                                 | s                                         | 55.3                                                             | 159.7                                                            |
| Quaternary carbon atoms (ppm): 159.7 |                                           |                                                                  |                                                                  |

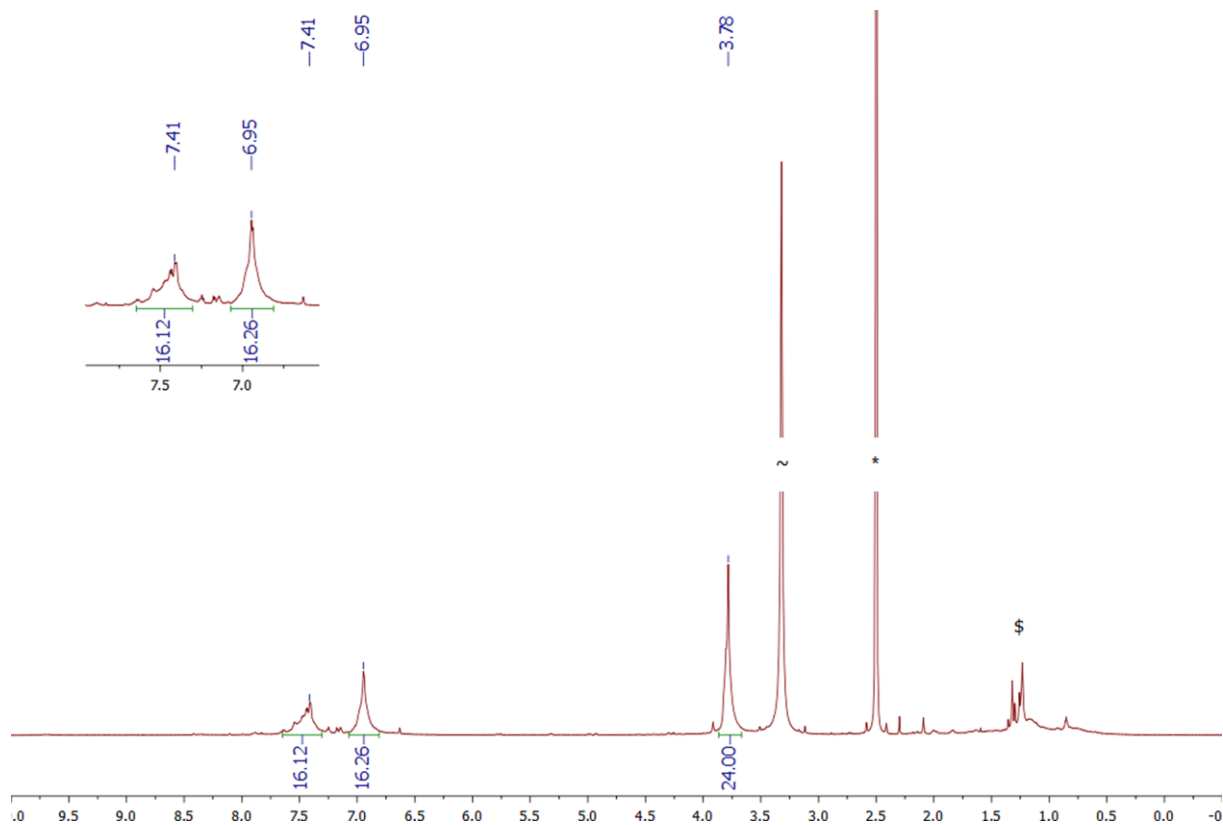

**Fig. S8.**  $^1\text{H}$  NMR spectrum of **6** (800 MHz,  $\text{DMSO-}d_6$ , 298 K). The symbols \*, ~ and \$ indicate  $\text{DMSO-}d_6$ , water and *n*-hexane residual peaks, respectively.

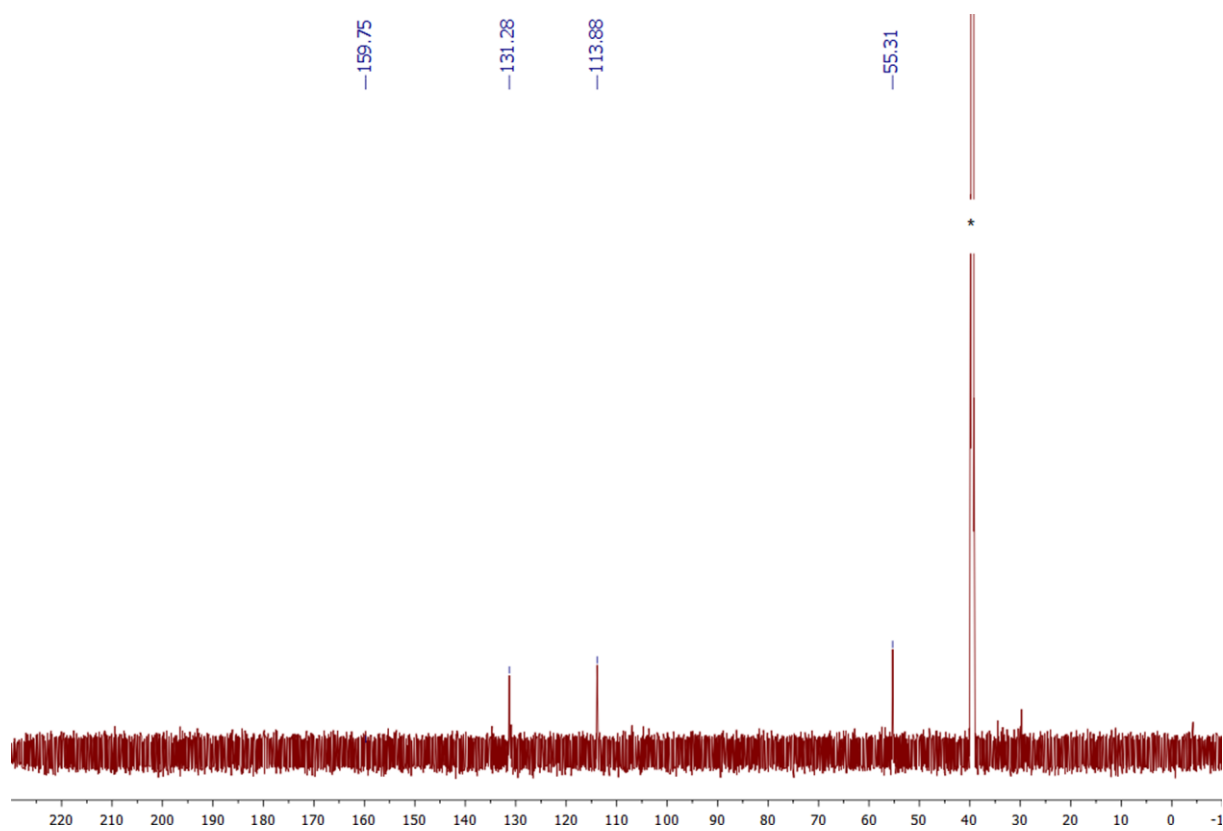

**Fig. S9.**  $^{13}\text{C}$  NMR spectrum recorded for **6** (201 MHz,  $\text{DMSO-}d_6$ , 298 K). The symbol \* indicates  $\text{DMSO-}d_6$  peak.



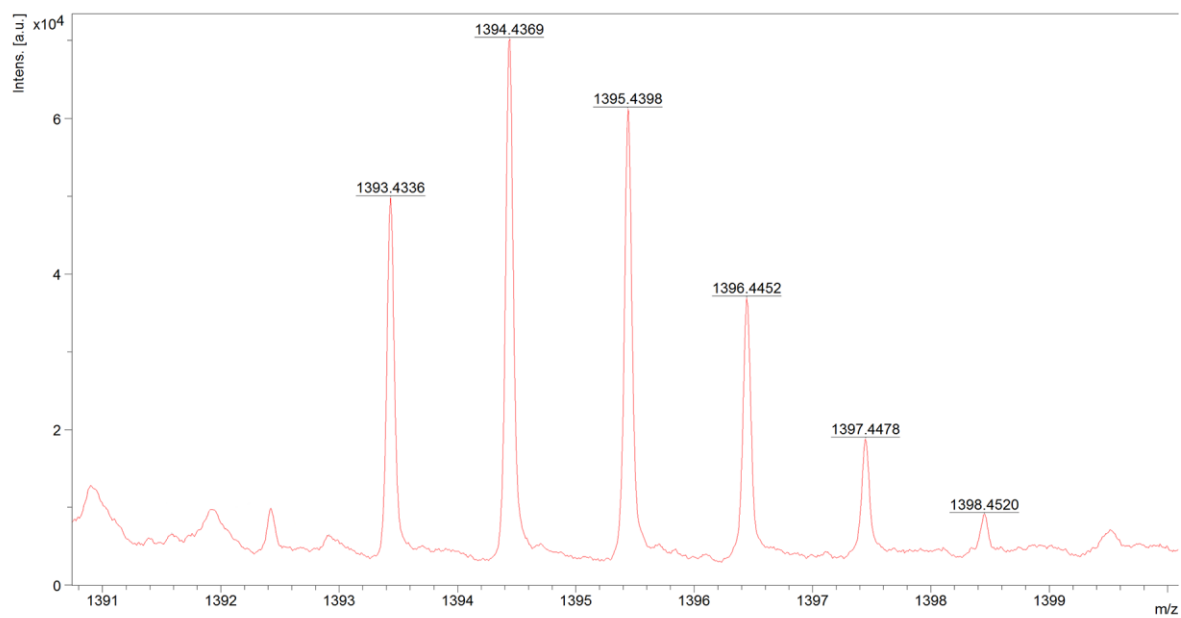

**Fig. S10.** MALDI-TOF HRMS spectrum of **6**. Calculated mass for  $C_{80}H_{56}MgN_{16}O_8 [M]^+$  1393.4345, found:  $m/z$  1393.4336; for  $C_{80}H_{57}MgN_{16}O_8 [M+H]^+$  1394.4423, found:  $m/z$  1394.4369.

NMR data of **7**

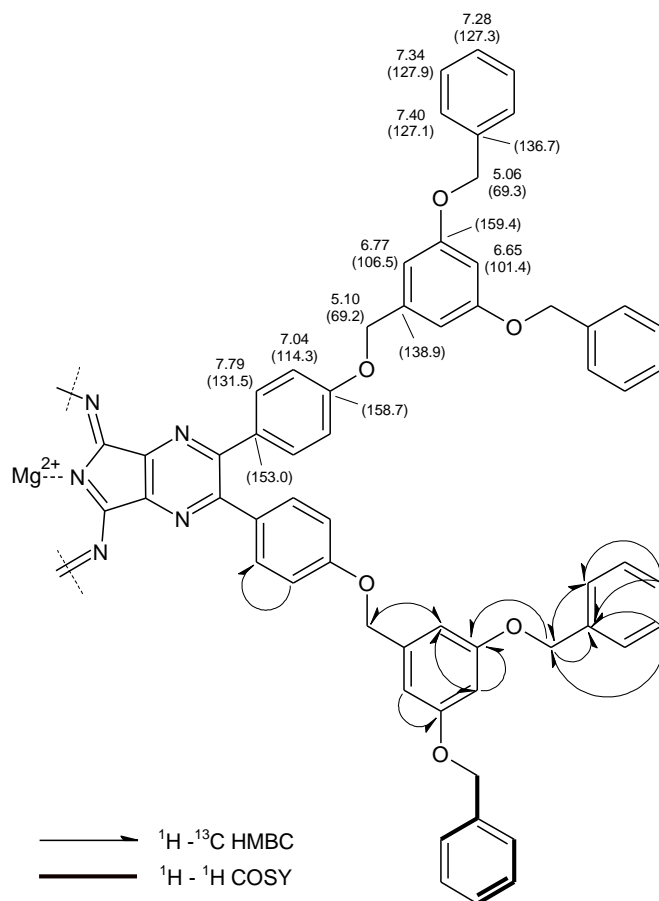

**Fig. S11.**  $^1\text{H}$  and  $^{13}\text{C}$  chemical shift values [ppm] of **7**. Key  $^1\text{H}$ - $^{13}\text{C}$  HMBC and  $^1\text{H}$ - $^1\text{H}$  COSY correlations are marked with arrows and bold lines, respectively.

**Table S4.**  $^1\text{H}$  and  $^{13}\text{C}$  NMR data obtained for **7** including key correlations determined from  $^1\text{H}$ - $^{13}\text{C}$  HSQC and  $^1\text{H}$ - $^{13}\text{C}$  HMBC spectra.

| $\delta_{\text{H}}$ (ppm)                                                                    | Multiplicity ( $J_{\text{H-H}}$ in Hz) | $^1\text{H}$ - $^{13}\text{C}$ HSQC $\delta_{\text{C}}$ (ppm) | $^1\text{H}$ - $^{13}\text{C}$ HMBC $\delta_{\text{C}}$ (ppm) |       |       |
|----------------------------------------------------------------------------------------------|----------------------------------------|---------------------------------------------------------------|---------------------------------------------------------------|-------|-------|
| 7.79                                                                                         | bs                                     | 131.5                                                         | -                                                             |       |       |
| 7.40                                                                                         | d (7.5)                                | 127.1                                                         | 127.3                                                         | 69.3  |       |
| 7.34                                                                                         | t (7.5)                                | 127.9                                                         | 136.7                                                         | 69.3  |       |
| 7.28                                                                                         | t (7.5)                                | 127.3                                                         | 136.7                                                         | 127.1 |       |
| 7.04                                                                                         | bs                                     | 114.3                                                         | 131.5                                                         |       |       |
| 6.77                                                                                         | s                                      | 106.5                                                         | 159.4                                                         | 101.4 | 69.2  |
| 6.65                                                                                         | s                                      | 101.4                                                         | 159.4                                                         | 106.5 |       |
| 5.10                                                                                         | s                                      | 69.2                                                          | 106.5                                                         |       |       |
| 5.06                                                                                         | s                                      | 69.3                                                          | 159.4                                                         | 136.7 | 127.1 |
| Other quaternary carbon atoms (ppm): 127.00, 127.8, 136.7, 138.9, 149.7, 153.0, 158.7, 159.4 |                                        |                                                               |                                                               |       |       |

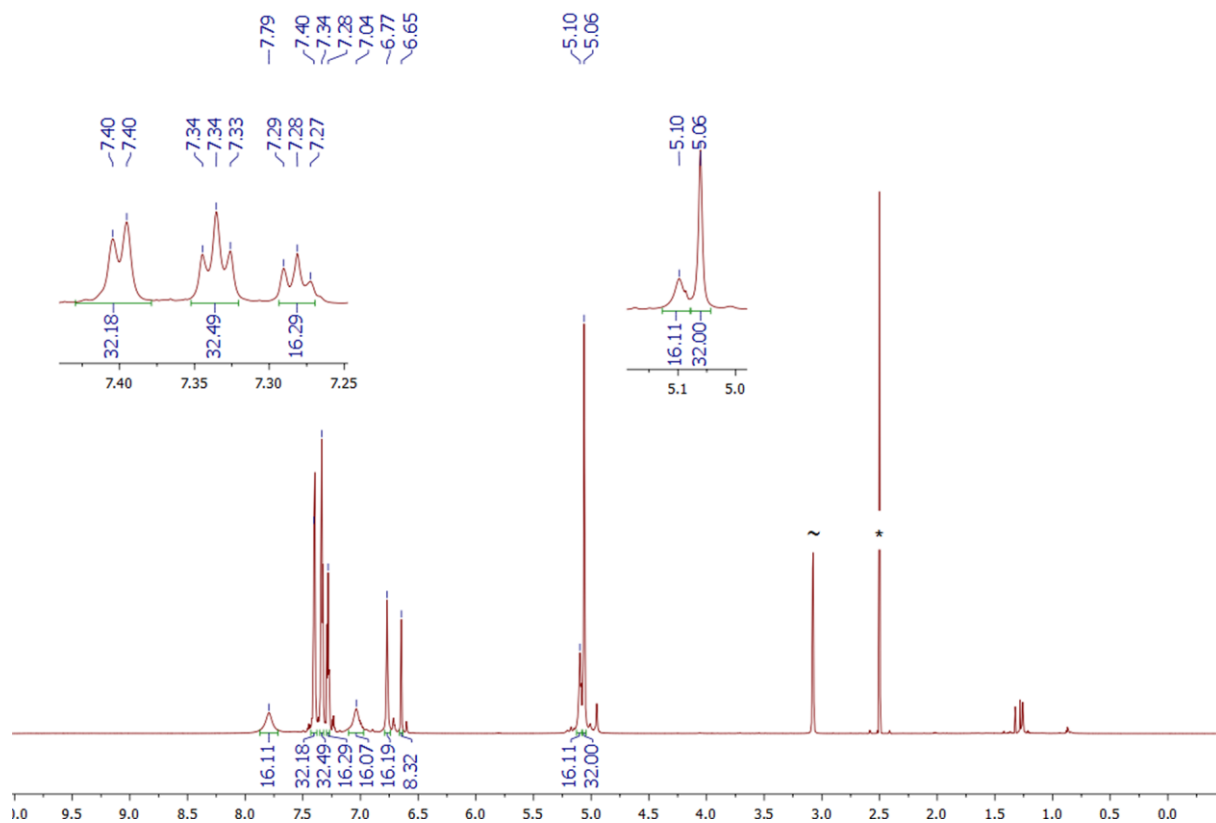

**Fig. S12.**  $^1\text{H}$  NMR spectrum of **7** (800 MHz,  $\text{DMSO-}d_6$ , 353 K). The symbols \* and ~ indicate  $\text{DMSO-}d_6$  and water residual peaks, respectively.

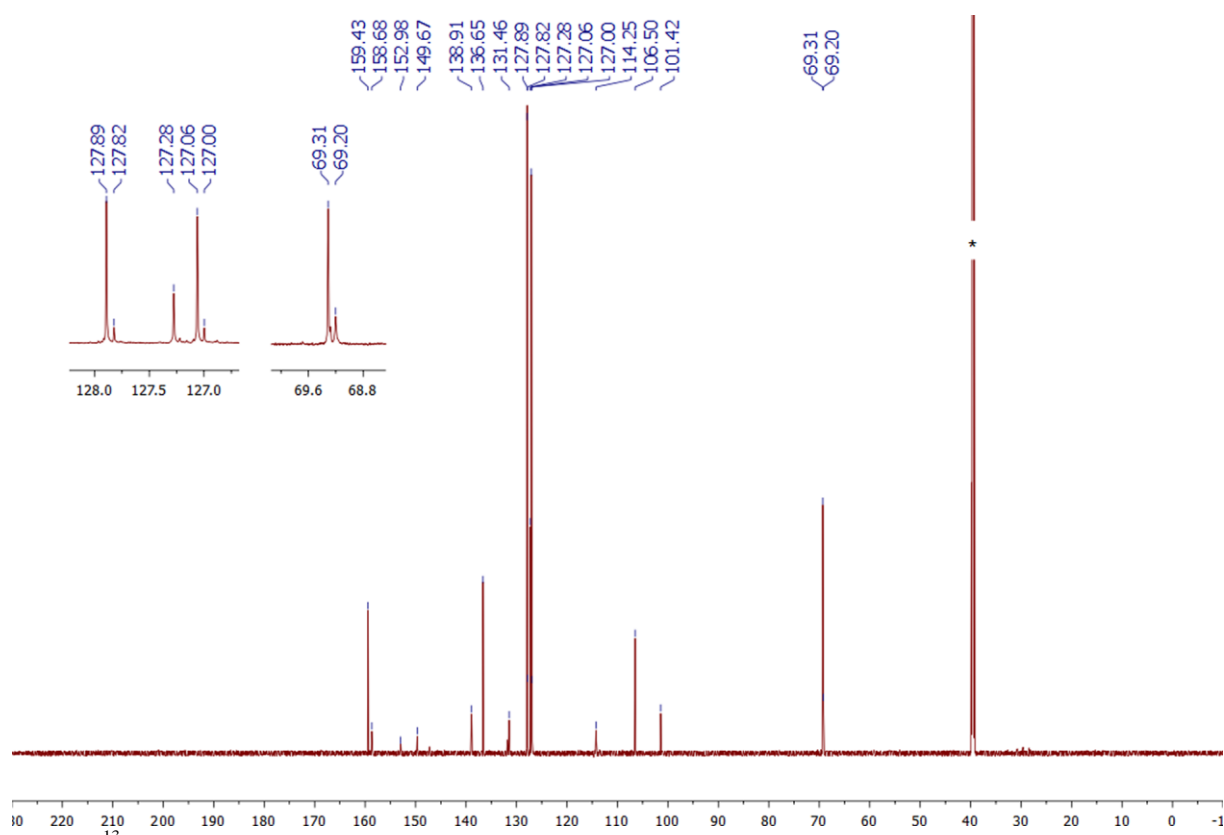

**Fig. S13.**  $^{13}\text{C}$  NMR spectrum recorded for **7** (201 MHz,  $\text{DMSO-}d_6$ , 353 K). The symbol \* indicates  $\text{DMSO-}d_6$  peak.

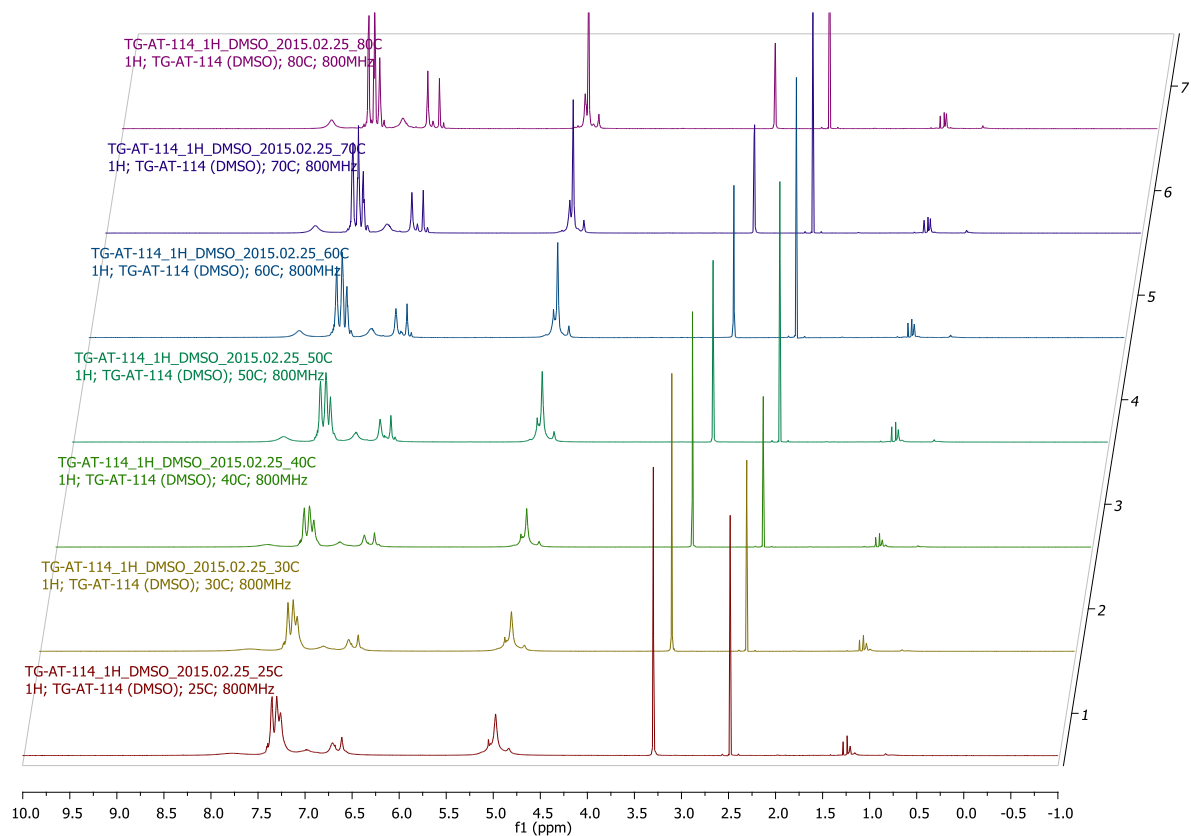

**Fig. S14.**  $^1\text{H}$  NMR spectrum of **7** (800 MHz,  $\text{DMSO-}d_6$ ). Temperature changes from 298 K (red, bottom) to 353 K (violet, top).

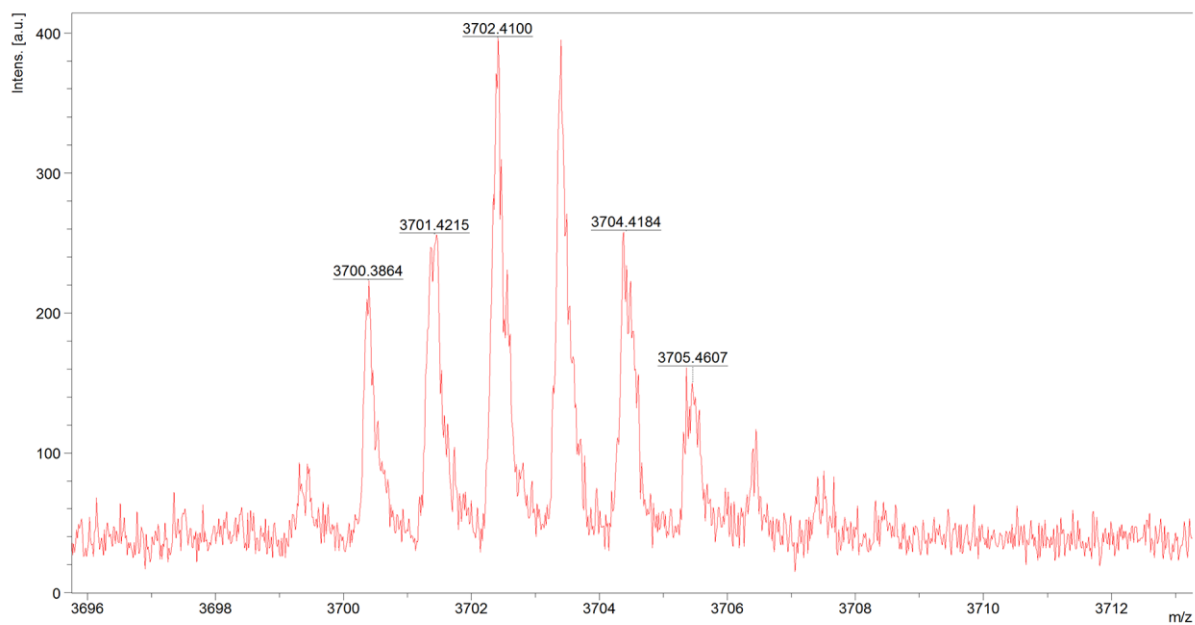

**Fig. S15.** MALDI-TOF HRMS spectrum of **7**. Calculated mass for  $\text{C}_{240}\text{H}_{184}\text{MgN}_{16}\text{O}_{24} [\text{M}]^+$  3700.3606, found:  $m/z$  3700.3864.

NMR data of **8**

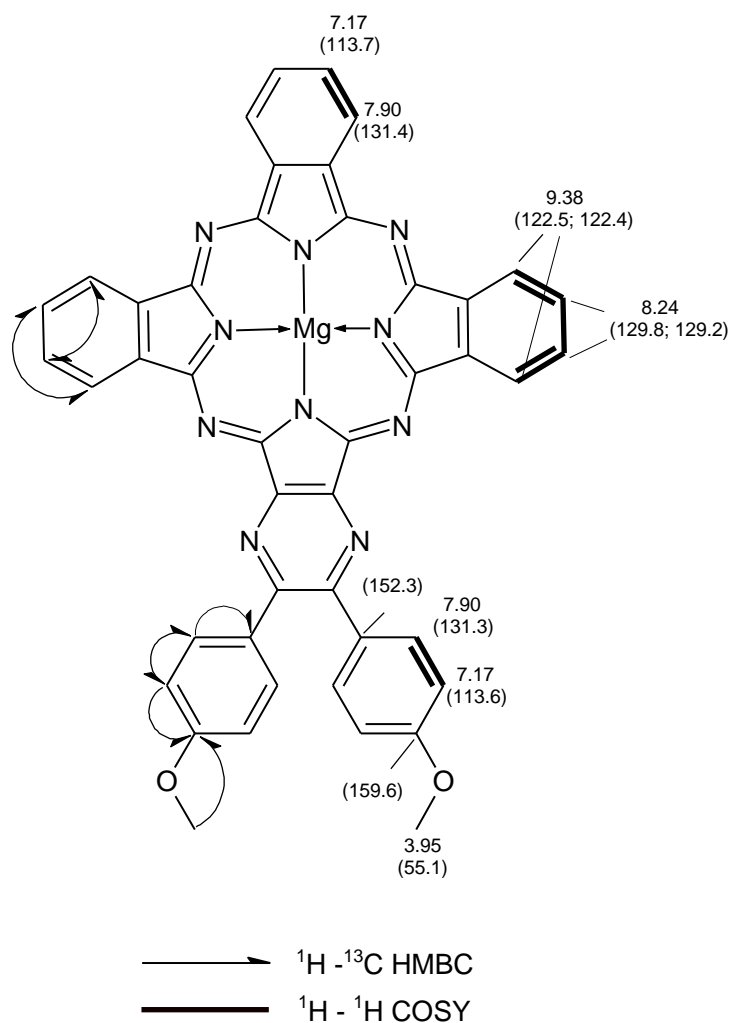

**Fig. S16.**  $^1\text{H}$  and ( $^{13}\text{C}$ ) chemical shift values [ppm] of **8**. Key  $^1\text{H}$ - $^{13}\text{C}$  HMBC and  $^1\text{H}$ - $^1\text{H}$  COSY correlations are marked with arrows and bold lines, respectively.

**Table S5.**  $^1\text{H}$  and  $^{13}\text{C}$  NMR data obtained for **8** including key correlations determined from  $^1\text{H}$ - $^{13}\text{C}$  HSQC and  $^1\text{H}$ - $^{13}\text{C}$  HMBC spectra.

| $\delta_{\text{H}}$ (ppm)                  | Multiplicity ( $J_{\text{H-H}}$ in Hz) | $^1\text{H}$ - $^{13}\text{C}$ HSQC $\delta_{\text{C}}$ (ppm) | $^1\text{H}$ - $^{13}\text{C}$ HMBC $\delta_{\text{C}}$ (ppm) |
|--------------------------------------------|----------------------------------------|---------------------------------------------------------------|---------------------------------------------------------------|
| 9.38                                       | m                                      | 122.5                                                         | 129.8                                                         |
| 9.38                                       | m                                      | 122.4                                                         | 129.2                                                         |
| 8.24                                       | m                                      | 129.8                                                         | 122.5                                                         |
| 8.24                                       | m                                      | 129.2                                                         | 122.4                                                         |
| 7.90                                       | m                                      | 131.4                                                         | 113.7                                                         |
| 7.90                                       | m                                      | 131.3                                                         | 152.3      113.6                                              |
| 7.17                                       | m                                      | 113.7                                                         | 131.4                                                         |
| 7.17                                       | m                                      | 113.6                                                         | 159.6      131.3                                              |
| 3.95                                       | m                                      | 55.1                                                          | 159.6                                                         |
| Other quaternary carbon atoms (ppm): 152.3 |                                        |                                                               |                                                               |

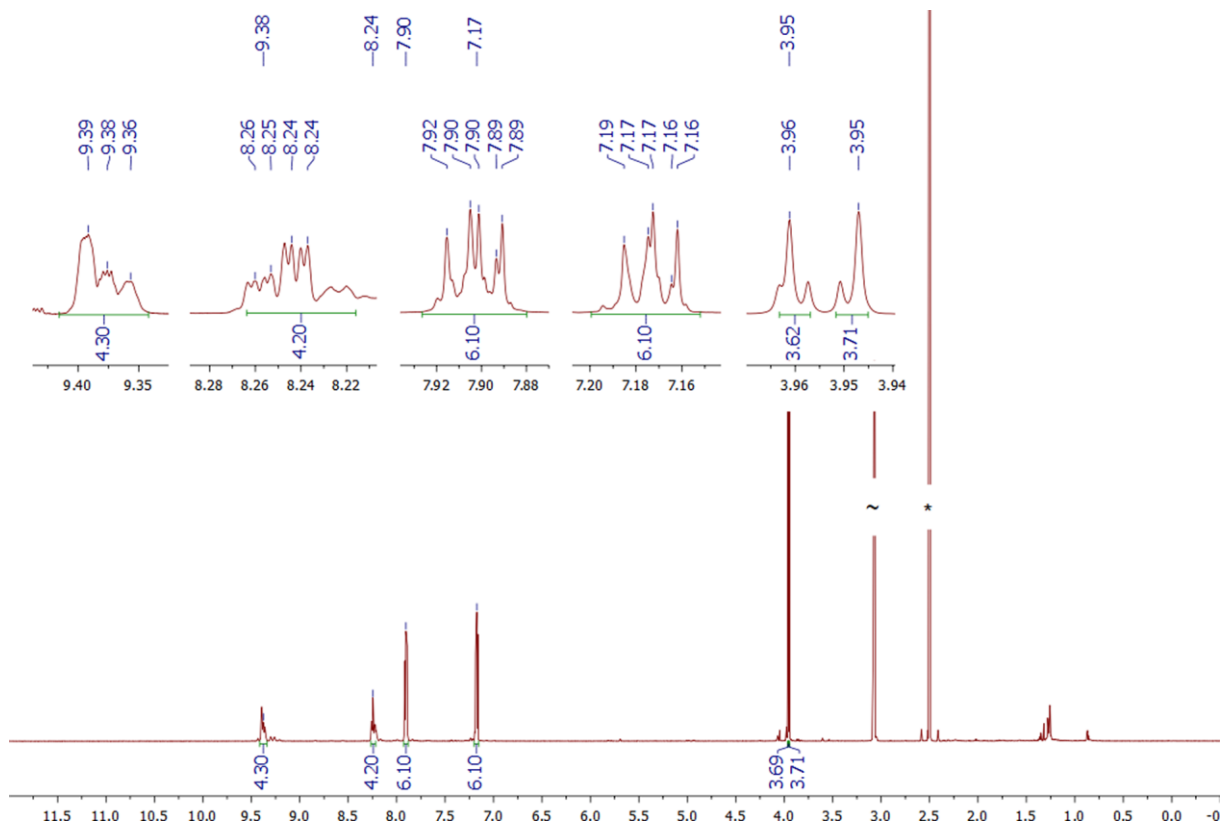

**Fig. S17.**  $^1\text{H}$  NMR spectrum of **8** (800 MHz,  $\text{DMSO-}d_6$ , 353 K). The symbols \* and ~ indicate  $\text{DMSO-}d_6$  and water residual peaks, respectively.

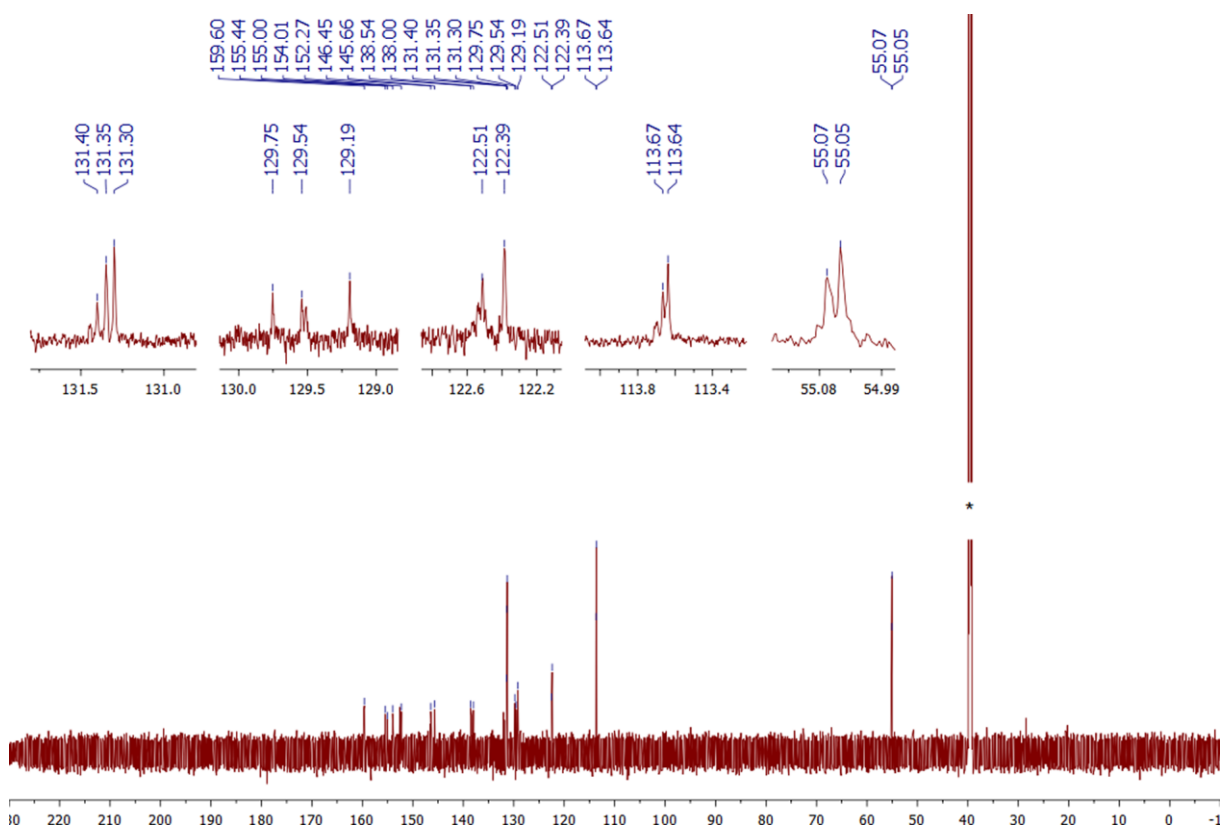

**Fig. S18.**  $^{13}\text{C}$  NMR spectrum recorded for **8** (201 MHz,  $\text{DMSO-}d_6$ , 353 K). The symbol \* indicates  $\text{DMSO-}d_6$  peak.

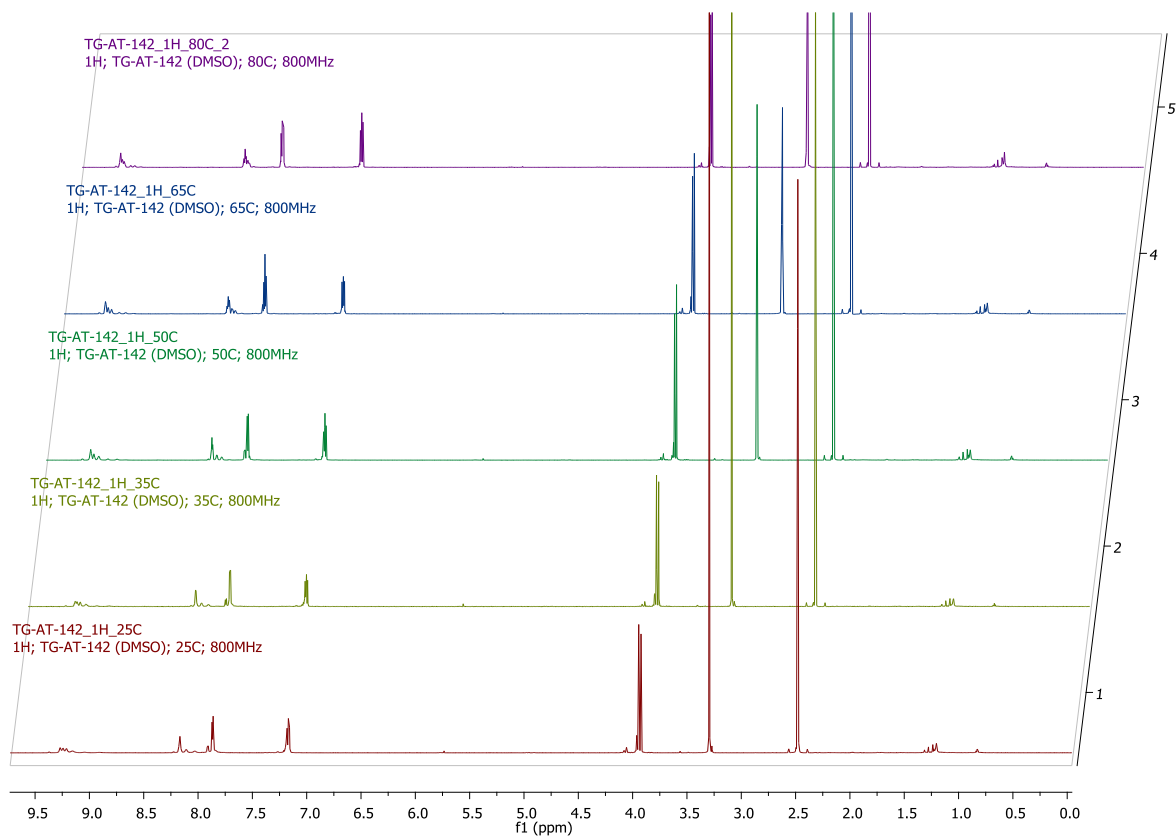

**Fig S19.**  $^1\text{H}$  NMR spectrum of **8** (800 MHz,  $\text{DMSO-}d_6$ ). Temperature changes from 298 K (red, bottom) to 353 K (violet, top). With the rise of temperature, peaks become better resolved.

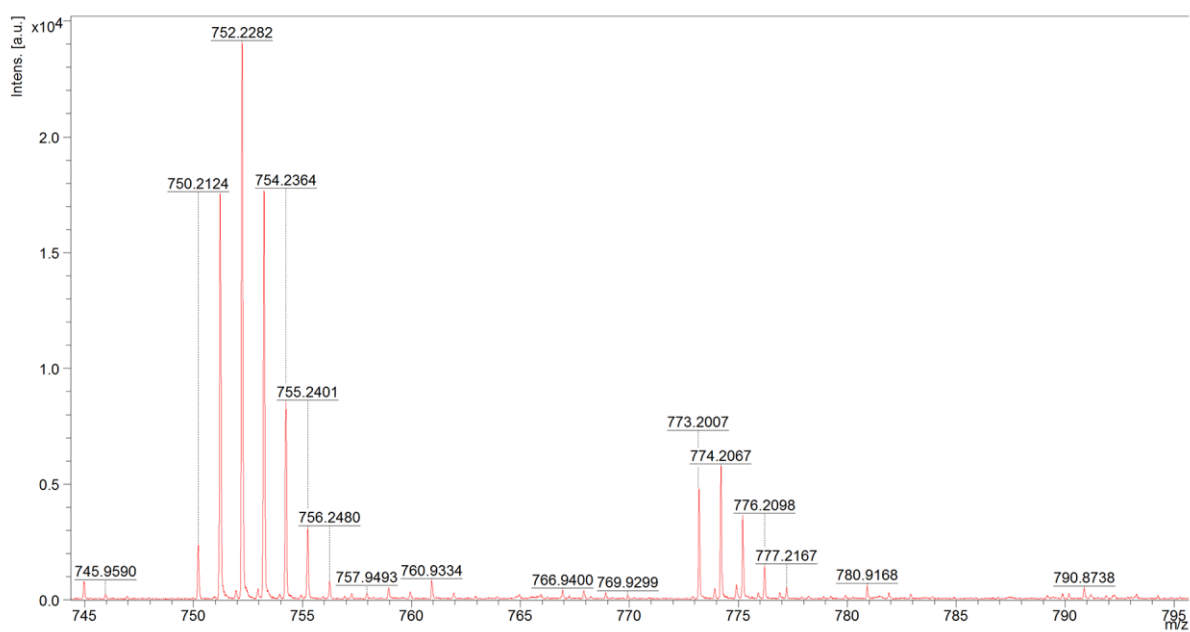

**Fig. S20.** MALDI-TOF HRMS spectrum of **8**. Calculated mass for  $\text{C}_{44}\text{H}_{26}\text{MgN}_{10}\text{O}_2$   $[\text{M}]^+$  750.2091, found:  $m/z$  750.2124; for  $\text{C}_{44}\text{H}_{26}\text{MgN}_{10}\text{NaO}_2$   $[\text{M}+\text{Na}]^+$  773.1988, found:  $m/z$  773.2007.

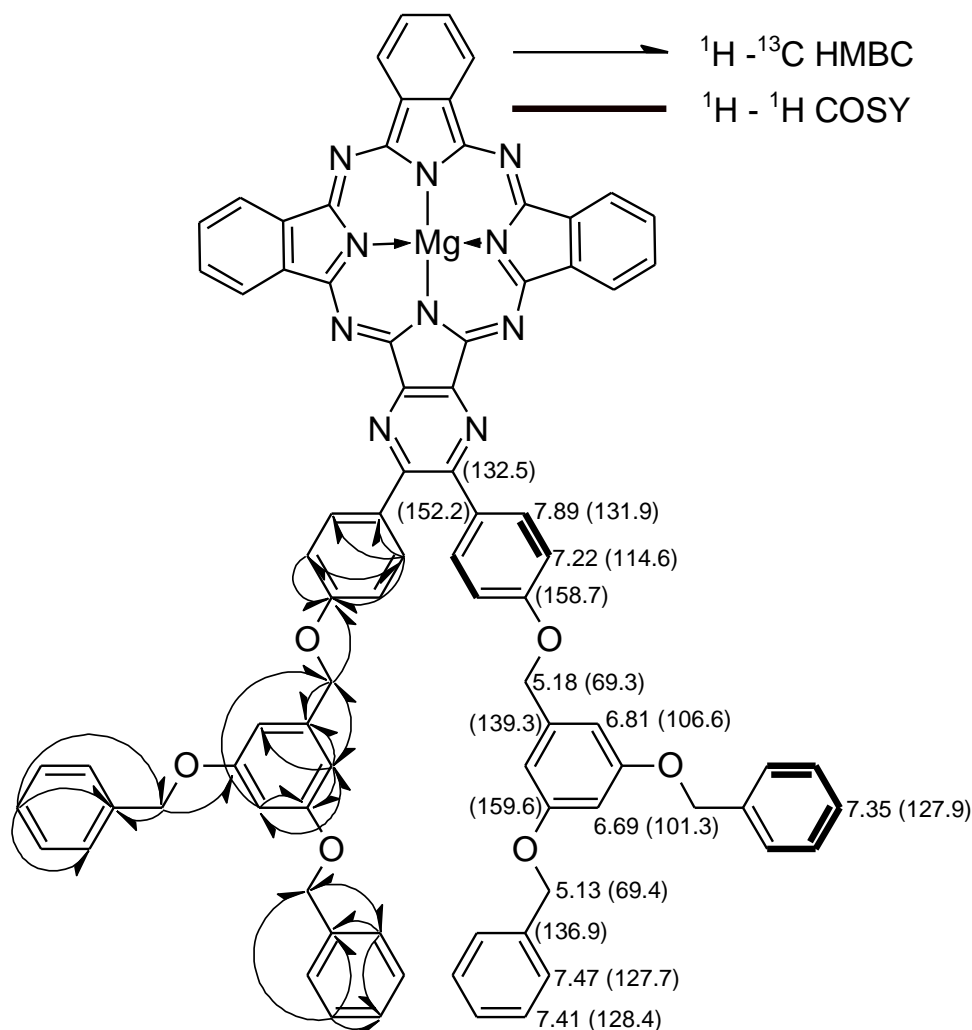

**Fig. S21.**  $^1\text{H}$  and ( $^{13}\text{C}$ ) chemical shift values [ppm] of **9**. Key  $^1\text{H} - ^{13}\text{C}$  HMBC and  $^1\text{H} - ^1\text{H}$  COSY correlations are marked with arrows and bold lines, respectively.

**Table S6.**  $^1\text{H}$  and  $^{13}\text{C}$  NMR data obtained for **9** including key correlations determined from  $^1\text{H} - ^{13}\text{C}$  HSQC and  $^1\text{H} - ^{13}\text{C}$  HMBC spectra.

| $\delta_{\text{H}}$ (ppm)                                                                      | Multiplicity<br>( $J_{\text{H-H}}$ in Hz) | $^1\text{H} - ^{13}\text{C}$ HSQC<br>$\delta_{\text{C}}$ (ppm) | $^1\text{H} - ^{13}\text{C}$ HMBC<br>$\delta_{\text{C}}$ (ppm) |       |       |       |
|------------------------------------------------------------------------------------------------|-------------------------------------------|----------------------------------------------------------------|----------------------------------------------------------------|-------|-------|-------|
| 9.13 – 8.59                                                                                    | m                                         | 122.5                                                          | 129.4                                                          | 129.2 |       |       |
| 8.09 – 7.93                                                                                    | m                                         | 129.4 129.2 128.4<br>128.3 127.9 127.7                         | 138.0                                                          | 122.5 |       |       |
| 7.89                                                                                           | m                                         | 131.9                                                          | 158.7                                                          | 152.2 | 131.9 | 114.6 |
| 7.47                                                                                           | m                                         | 127.7                                                          | 136.9                                                          | 127.9 | 69.4  |       |
| 7.41                                                                                           | m                                         | 128.4                                                          | 136.9                                                          | 128.4 | 69.4  |       |
| 7.35                                                                                           | m                                         | 127.9                                                          | 136.9                                                          | 127.7 | 69.4  |       |
| 7.22                                                                                           | m                                         | 114.6                                                          | 158.7                                                          | 132.5 | 114.6 |       |
| 6.81                                                                                           | m                                         | 106.6                                                          | 159.6                                                          | 139.3 | 106.6 | 101.3 |
| 6.69                                                                                           | m                                         | 101.3                                                          | 69.3                                                           | 159.6 | 106.6 | 69.3  |
| 5.18                                                                                           | s                                         | 69.3                                                           | 158.7                                                          | 139.3 | 106.6 |       |
| 5.13                                                                                           | s                                         | 69.4                                                           | 159.6                                                          | 136.9 | 127.7 |       |
| Other carbon atoms (ppm): 154.7, 154.4, 153.8, 153.5, 152.4, 152.0, 145.8, 145.7, 138.5, 138.1 |                                           |                                                                |                                                                |       |       |       |



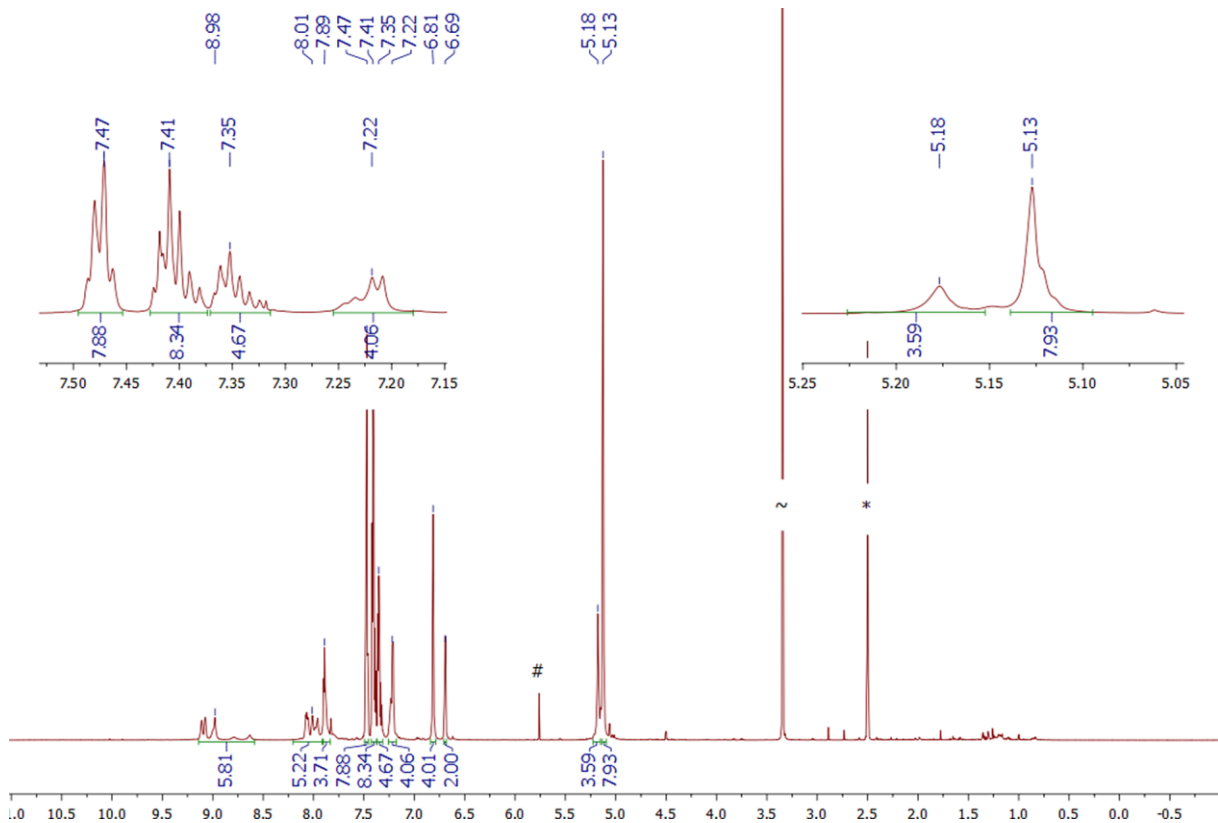

**Fig. S22.**  $^1\text{H}$  NMR spectrum of **9** (800 MHz,  $\text{DMSO-}d_6$ , 298 K). The symbols #, ~ and \* indicate  $\text{CH}_2\text{Cl}_2$  water and  $\text{DMSO-}d_6$  residual peaks, respectively.

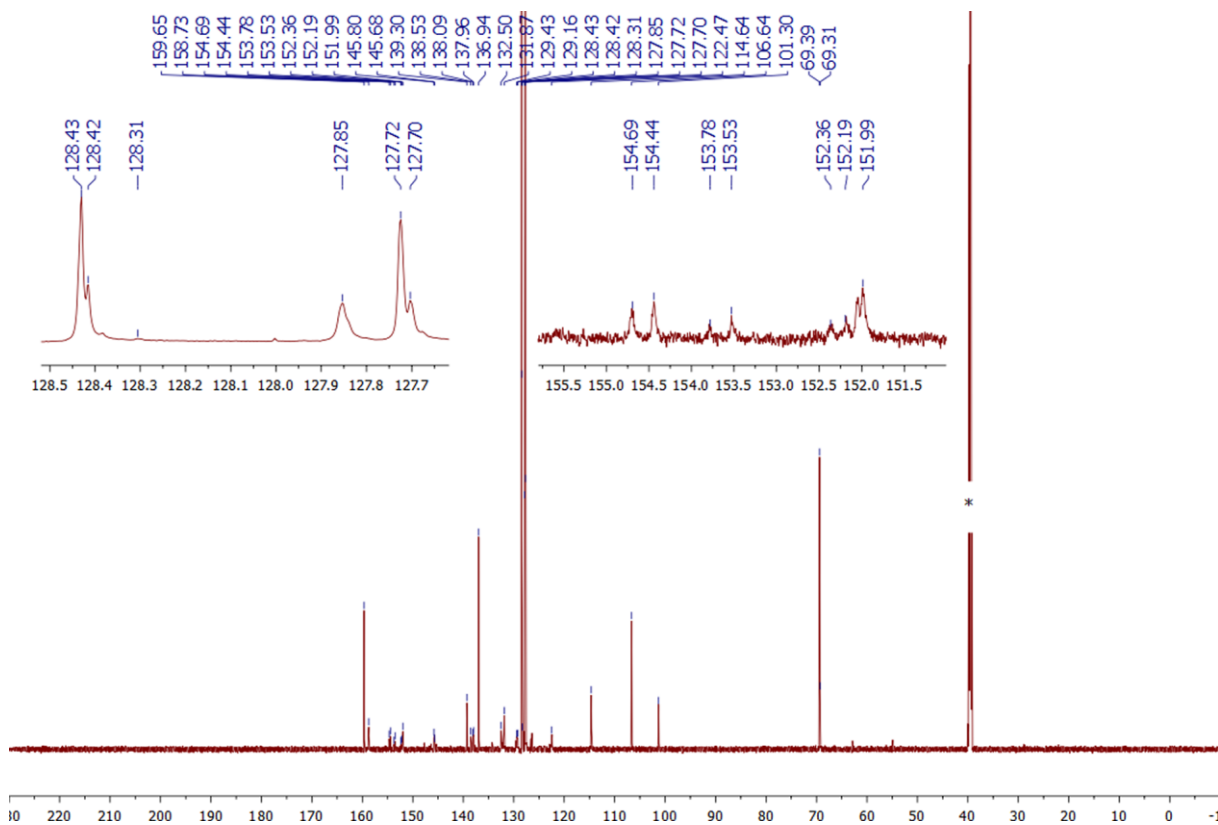

**Fig. S23.**  $^{13}\text{C}$  NMR spectrum recorded for **9** (201 MHz,  $\text{DMSO-}d_6$ , 298 K). The symbol \* indicates  $\text{DMSO-}d_6$  peak.

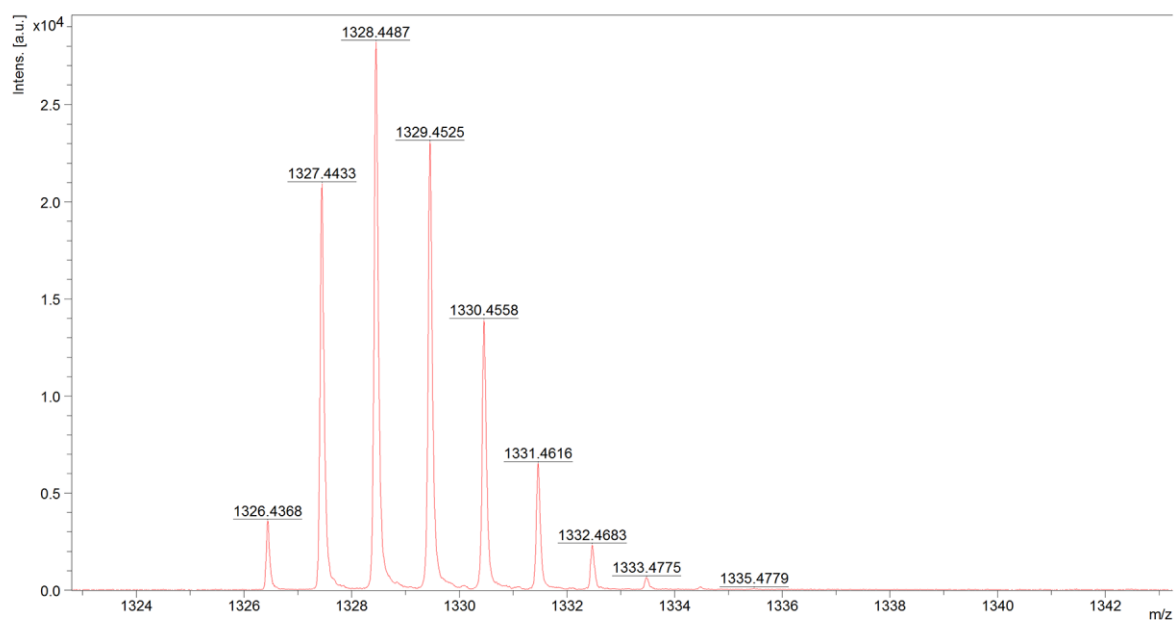

**Fig. S24.** MALDI-TOF HRMS spectrum of **9**. Calculated mass for  $C_{84}H_{58}MgN_{10}O_6 [M]^+$  1327.4420, found:  $m/z$  1327.4433; for  $C_{84}H_{59}MgN_{10}O_6 [M+H]^+$  1328.4498, found:  $m/z$  1328.4487.

## X-Ray data

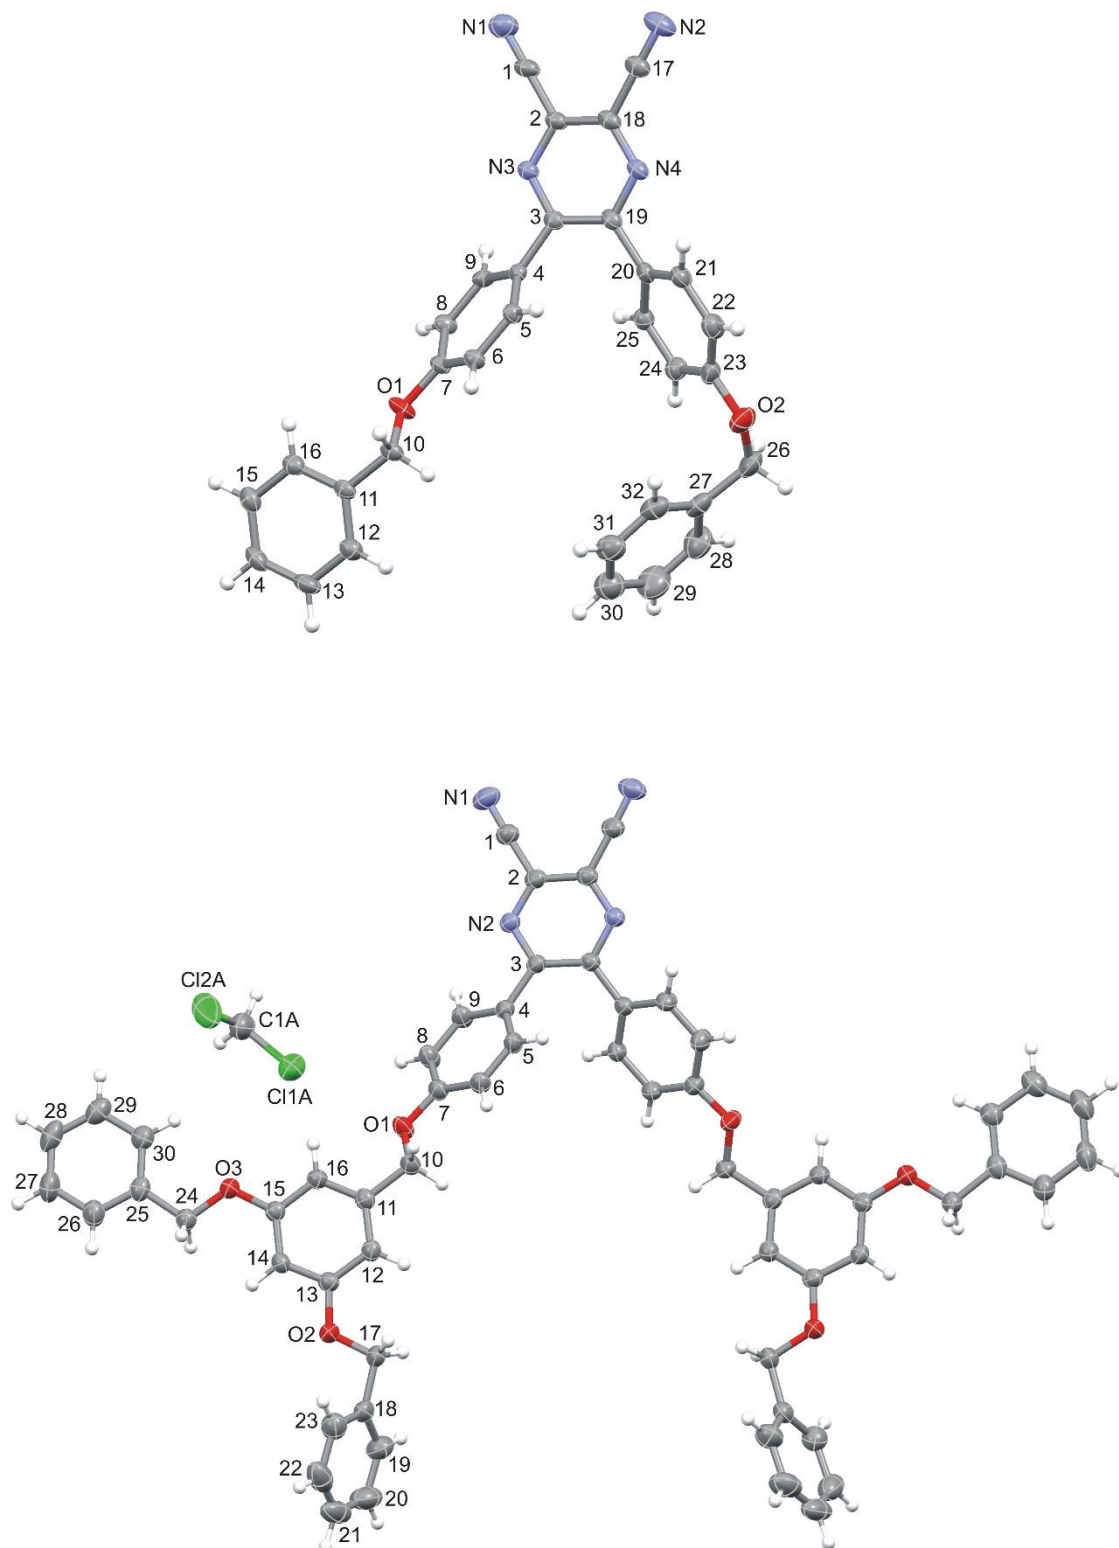

**Fig. S25.** Molecular structures of **5b** (top) and **5c** (bottom). In **5c** only symmetry independent part of the molecule is labeled. The displacement ellipsoids are shown at the 50% of probability level.

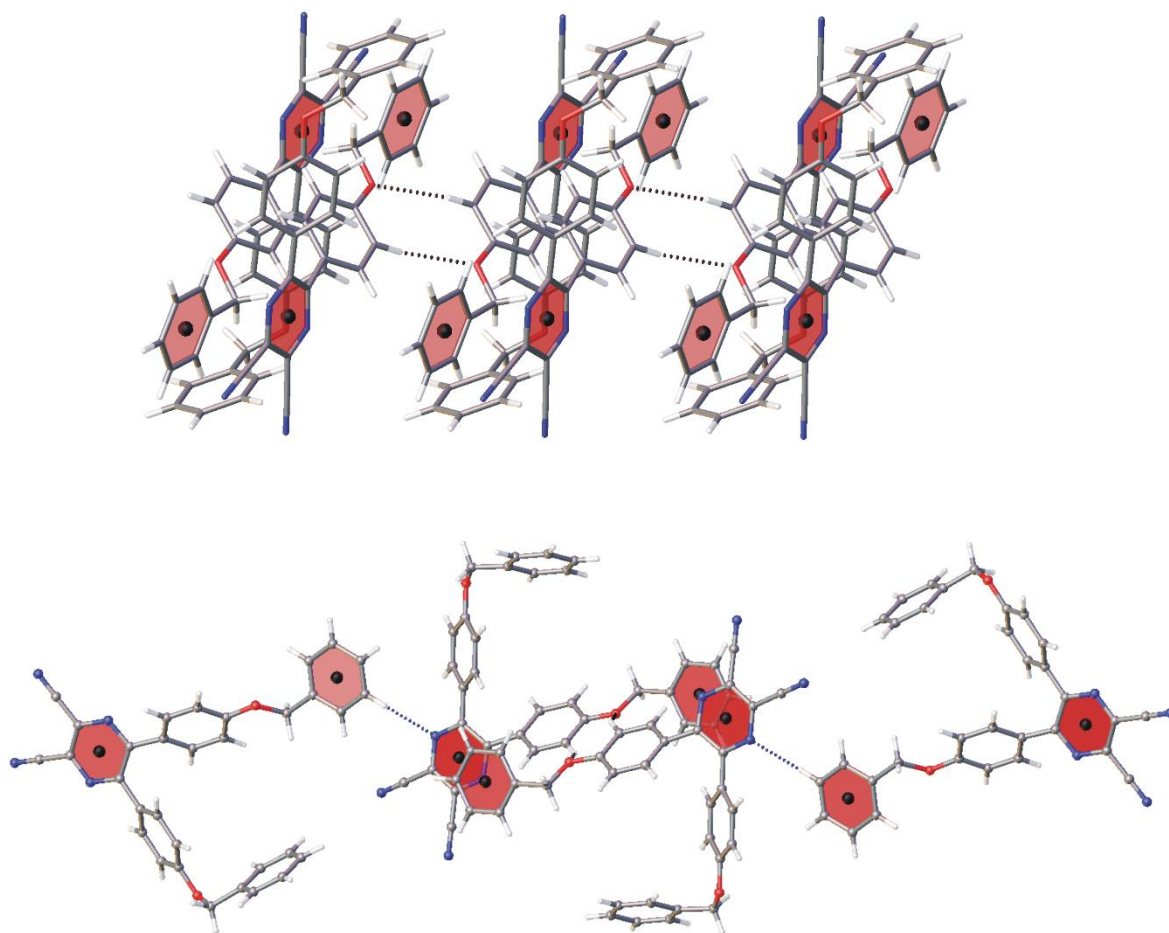

**Fig. S26.** C-H...O (top) and C-H...N (bottom) interactions in **5b**. Hydrogen bonds are marked as dotted lines.

**Table S7.** Experimental details

For all structures:  $Z = 4$ . Experiments were carried out at 130 K. Absorption was corrected for by multi-scan methods, *CrysAlis PRO*, Agilent Technologies, 2014. H-atom parameters were constrained.

|                                                                            | <b>5b</b>                           | <b>5c</b>                              |
|----------------------------------------------------------------------------|-------------------------------------|----------------------------------------|
| Crystal data                                                               |                                     |                                        |
| Chemical formula                                                           | $C_{32}H_{22}N_4O_2$                | $C_{60}H_{46}N_4O_6 \cdot 2(CH_2Cl_2)$ |
| $M_r$                                                                      | 494.53                              | 1088.86                                |
| Crystal system, space group                                                | Monoclinic, $P2_1/n$                | Monoclinic, $C2/c$                     |
| $a, b, c$ (Å)                                                              | 8.2968 (3), 11.2161 (5), 27.629 (1) | 23.8249 (7), 15.5643 (4), 16.2565 (4)  |
| $\beta$ (°)                                                                | 97.453 (3)                          | 117.473 (3)                            |
| $V$ (Å <sup>3</sup> )                                                      | 2549.38 (17)                        | 5348.4 (3)                             |
| Radiation type                                                             | Mo $K\alpha$                        | Cu $K\alpha$                           |
| $\mu$ (mm <sup>-1</sup> )                                                  | 0.08                                | 2.47                                   |
| Crystal size (mm)                                                          | 0.50 × 0.30 × 0.20                  | 0.40 × 0.20 × 0.20                     |
| Data collection                                                            |                                     |                                        |
| Diffractometer                                                             | Xcalibur                            | SuperNova                              |
| $T_{min}, T_{max}$                                                         | 0.991, 1.000                        | 0.210, 1.000                           |
| No. of measured, independent and observed [ $I > 2\sigma(I)$ ] reflections | 14332, 4651, 3332                   | 12425, 4913, 4091                      |
| $R_{int}$                                                                  | 0.038                               | 0.043                                  |
| $(\sin \theta/\lambda)_{max}$ (Å <sup>-1</sup> )                           | 0.602                               | 0.602                                  |
| Refinement                                                                 |                                     |                                        |
| $R[F^2 > 2\sigma(F^2)], wR(F^2), S$                                        | 0.046, 0.097, 1.04                  | 0.080, 0.249, 1.05                     |
| No. of reflections                                                         | 4651                                | 4913                                   |
| No. of parameters                                                          | 343                                 | 344                                    |
| $\Delta_{max}, \Delta_{min}$ (e Å <sup>-3</sup> )                          | 0.18, -0.19                         | 0.65, -0.69                            |

**Table S8.** Selected torsion angles (°) for **5b** and **5c**.

| <b>5b</b>      |              | <b>5c</b>      |            |
|----------------|--------------|----------------|------------|
| C3—C19—C20—C25 | 39.9 (2)     | N2—C3—C4—C9    | 36.6 (3)   |
| C6—C7—O1—C10   | 2.2 (2)      | C10—O1—C7—C6   | -2.7 (4)   |
| C11—C10—O1—C7  | 176.55 (14)  | C7—O1—C10—C11  | 177.2 (2)  |
| C19—C3—C4—C5   | 44.6 (2)     | O1—C10—C11—C16 | -37.6 (3)  |
| C22—C23—O2—C26 | -168.45 (17) | C17—O2—C13—C12 | 7.0 (4)    |
| C27—C26—O2—C23 | -79.9 (2)    | C24—O3—C15—C16 | -178.5 (2) |
| N3—C3—C4—C5    | -132.79 (16) | C24—O3—C15—C14 | 1.1 (3)    |
| N4—C19—C20—C21 | 38.7 (2)     | C13—O2—C17—C18 | 177.0 (2)  |
| O1—C10—C11—C12 | 128.59 (16)  | O2—C17—C18—C23 | -70.8 (4)  |
| O2—C26—C27—C32 | 168.44 (17)  | O2—C17—C18—C19 | 105.2 (3)  |
|                |              | O3—C24—C25—C26 | -178.8 (2) |
|                |              | O3—C24—C25—C30 | 2.8 (4)    |

**Table S9.** Dihedral angles (°) between the best planes of aromatic rings in **5b** and **5c**.

| <b>5b</b>       |          |                  |           |
|-----------------|----------|------------------|-----------|
| pyrazine/ring A | 45.00(6) | pyrazine/ring C  | 39.12 (7) |
| pyrazine/ring B | 6.24(8)  | pyrazine/ring D  | 76.67(6)  |
| <b>5c</b>       |          |                  |           |
| pyrazine/ring A | 39.7(1)  | pyrazine/ring B1 | 3.7(2)    |
| pyrazine/ring B | 0.6(2)   | pyrazine/ring B2 | 68.1(1)   |
| ring B/ring B1  | 3.5 (2)  | ring B/ring B2   | 67.5 (1)  |

**Table S10.** Hydrogen-bond parameters for **5b**.

| <i>D</i> —H··· <i>A</i>     | <i>D</i> —H (Å) | H··· <i>A</i> (Å) | <i>D</i> ··· <i>A</i> (Å) | <i>D</i> —H··· <i>A</i> (°) |
|-----------------------------|-----------------|-------------------|---------------------------|-----------------------------|
| C8—H8···O1 <sup>i</sup>     | 0.95            | 2.50              | 3.3391 (19)               | 147.0                       |
| C22—H22···N2 <sup>iii</sup> | 0.95            | 2.68              | 3.382 (2)                 | 131.2                       |

Symmetry code(s): (i)  $-x, -y+1, -z+1$ ; (ii)  $x-1/2, -y+1/2, z+1/2$ ; (iii)  $-x+3/2, y-1/2, -z+1/2$ .

## HPLC analysis of purity

### Porphyrazine 7

The chromatographic separation was achieved on an octadecylsilane coated column, 150 mm × 4.6 mm, 5 μm (Eclipse XDB-C18, Agilent), using phase system indicated below, at a flow rate of 1.0 mL/min

| time [min] | MeOH | THF | CH <sub>2</sub> Cl <sub>2</sub> |
|------------|------|-----|---------------------------------|
| 0          | 50   | 20  | 30                              |
| 5          | 50   | 20  | 30                              |
| 8          | 20   | 50  | 30                              |
| 15         | 20   | 50  | 30                              |

assay            99.4% measured at  $\lambda = 650$  nm

                  95% measured at  $\lambda = 343$  nm

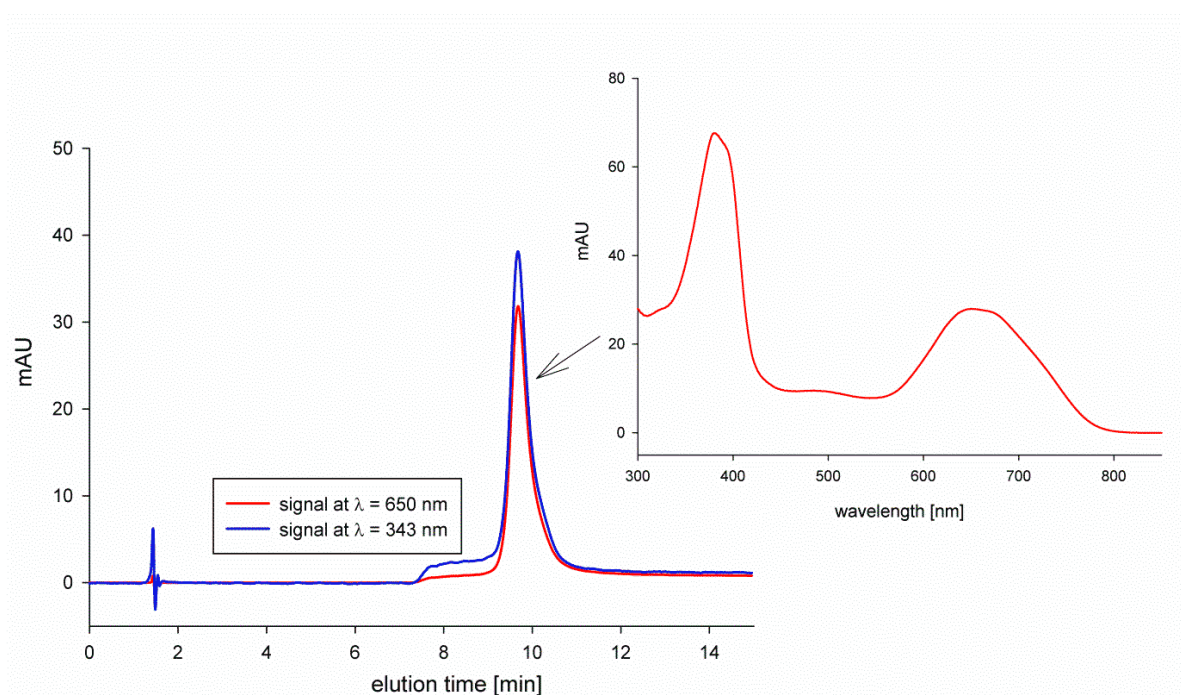

**Fig. S27.** Chromatogram and UV-vis spectrum of 7.

## Porphyrine 9

The chromatographic separation was achieved on an octadecylsilane coated column, 150 mm × 4.6 mm, 5 μm (Eclipse XDB-C18, Agilent), using isocratic elution conditions, at a flow rate of 1.0 mL/min (elution conditions MeOH 55%; THF 15%; CH<sub>2</sub>Cl<sub>2</sub> 30%)

assay 100% measured at  $\lambda = 678$  nm

94% measured at  $\lambda = 343$  nm

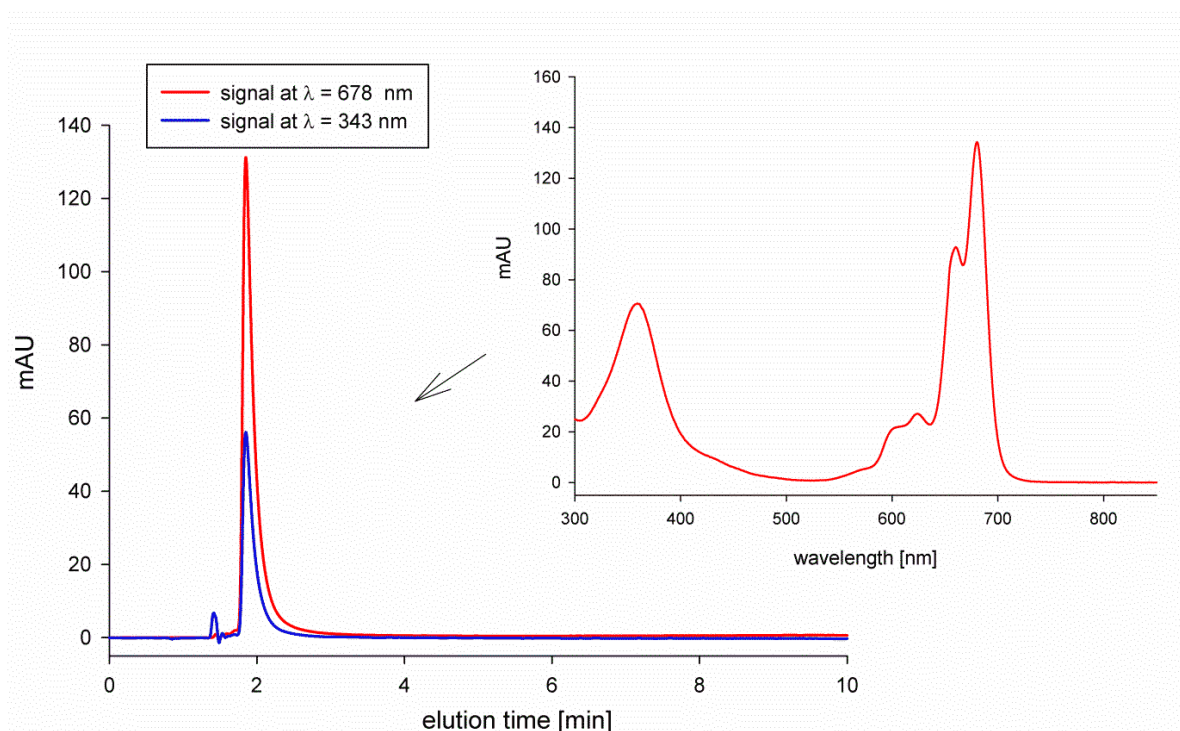

**Fig. S28.** Chromatogram and UV-vis spectrum of **9**.



## Aggregation study

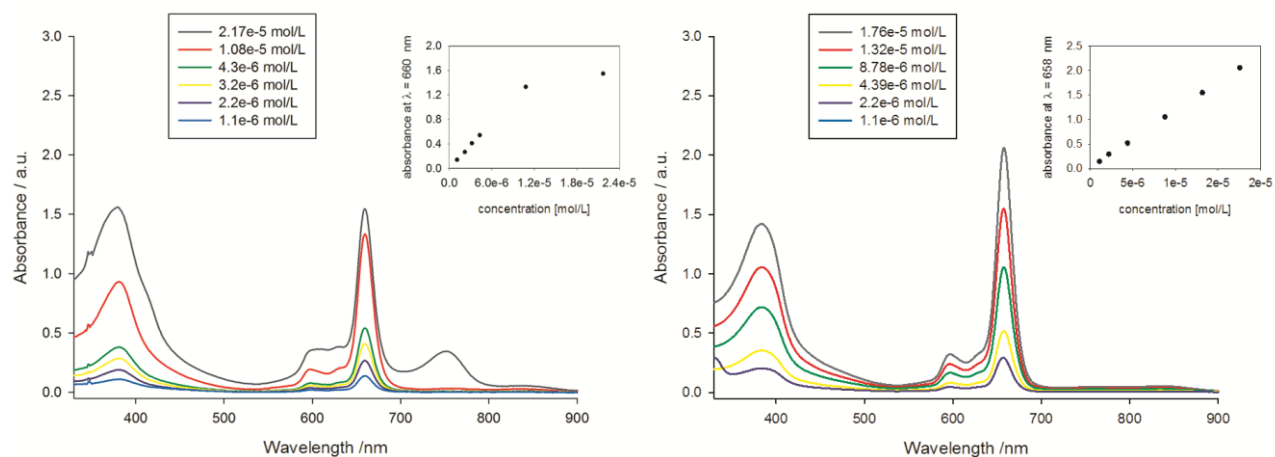

**Fig. S29.** UV-Vis absorption spectra of **6** in DMF (left) and DMSO (right). Inset presents a correlation between absorbance and concentration.

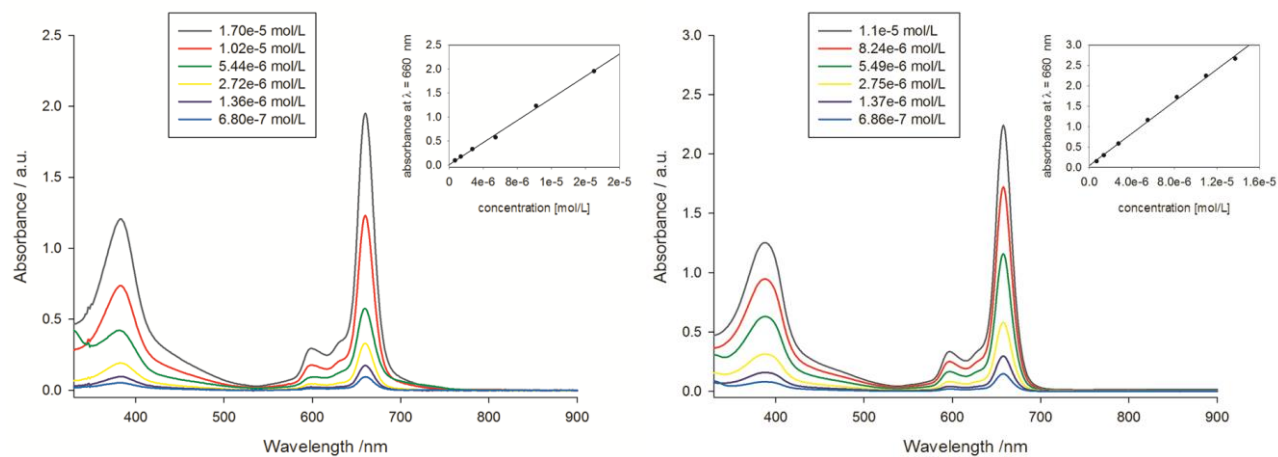

**Fig. S30.** UV-Vis absorption spectra of **7** in DMF (left) and DMSO (right). Inset presents a correlation between absorbance and concentration.

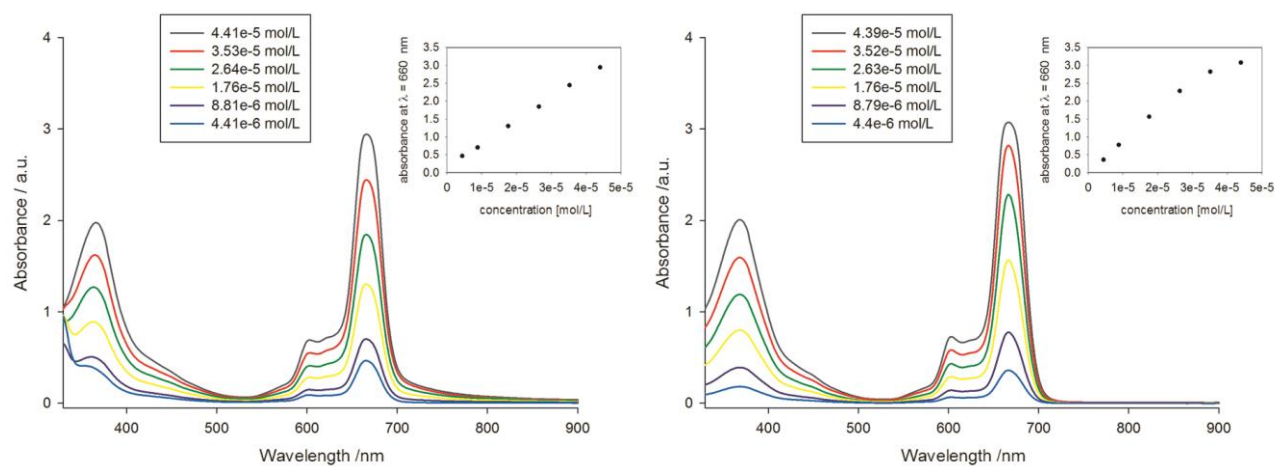

**Fig. S31.** UV-Vis absorption spectra of **8** in DMF (left) and DMSO (right). Inset presents a correlation between absorbance and concentration.

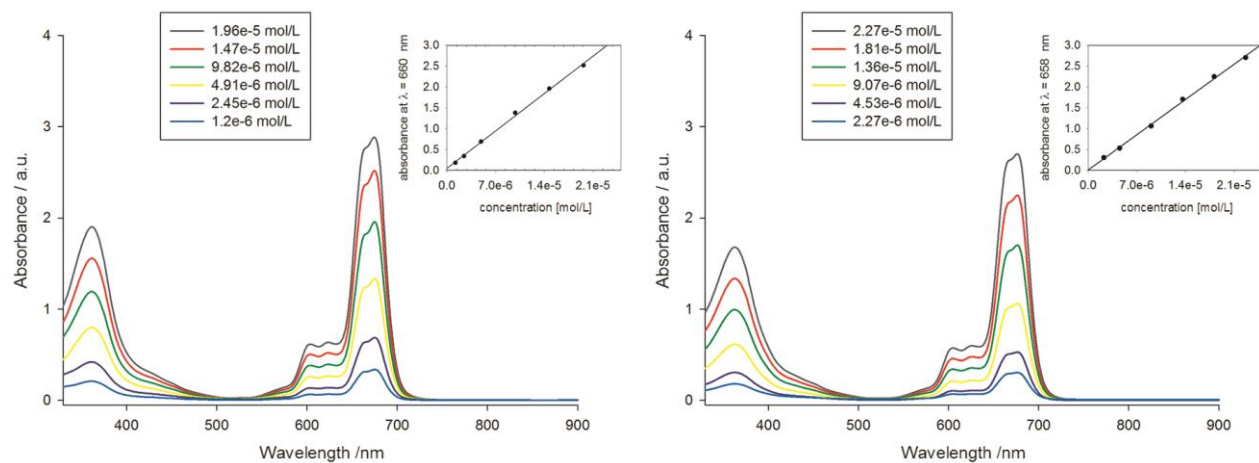

**Fig. S32.** UV-Vis absorption spectra of **9** in DMF (left) and DMSO (right). Inset presents a correlation between absorbance and concentration.

**Table S11.** Statistical parameters of absorbance vs. concentration linear regression in DMF.

| Compound | DMF        |            |         |            |           |        |        |                |               |              |   |
|----------|------------|------------|---------|------------|-----------|--------|--------|----------------|---------------|--------------|---|
|          | a          | $\Delta a$ | b       | $\Delta b$ | Sa        | Sb     | ta     | t <sub>b</sub> | t $\alpha, f$ | r            | n |
| <b>6</b> | 70175.457  | 32537.798  | 0.199   | 0.332      | 12655.542 | 0.129  | 5.545  | <b>1.542</b>   | <b>2.571</b>  | <b>0.941</b> | 6 |
| <b>7</b> | 114900.239 | 7215.501   | 0.00881 | 0.061      | 2806.496  | 0.0238 | 40.941 | <b>0.369</b>   | <b>2.571</b>  | <b>0.999</b> | 6 |
| <b>8</b> | 63404.083  | 2084.188   | 0.172   | 0.056      | 810.653   | 0.0217 | 78.214 | <b>7.952</b>   | <b>2.571</b>  | <b>1.000</b> | 6 |
| <b>9</b> | 128087.450 | 7492.866   | 0.0495  | 0.083      | 2914.378  | 0.0322 | 43.950 | <b>1.538</b>   | <b>2.571</b>  | <b>0.999</b> | 6 |

**Table S12.** Statistical parameters of absorbance vs. concentration linear regression in DMSO.

| Compound | DMSO       |            |       |            |          |       |         |                |               |              |   |
|----------|------------|------------|-------|------------|----------|-------|---------|----------------|---------------|--------------|---|
|          | a          | $\Delta a$ | b     | $\Delta b$ | Sa       | Sb    | ta      | t <sub>b</sub> | t $\alpha, f$ | r            | n |
| <b>6</b> | 115800.395 | 2199.781   | 0.024 | 0.022      | 855.613  | 0.008 | 135.342 | <b>2.834</b>   | <b>2.571</b>  | <b>1.000</b> | 6 |
| <b>7</b> | 204248.508 | 5013.118   | 0.02  | 0.031      | 1949.871 | 0.012 | 104.750 | <b>1.627</b>   | <b>2.571</b>  | <b>1.000</b> | 6 |
| <b>8</b> | 70887.836  | 14958.811  | 0.203 | 0.399      | 5818.285 | 0.155 | 12.184  | <b>1.308</b>   | <b>2.571</b>  | <b>0.987</b> | 6 |
| <b>9</b> | 120748.114 | 7203.957   | 0.009 | 0.099      | 2802.006 | 0.039 | 43.093  | <b>0.238</b>   | <b>2.571</b>  | <b>0.999</b> | 6 |

## Singlet oxygen measurements

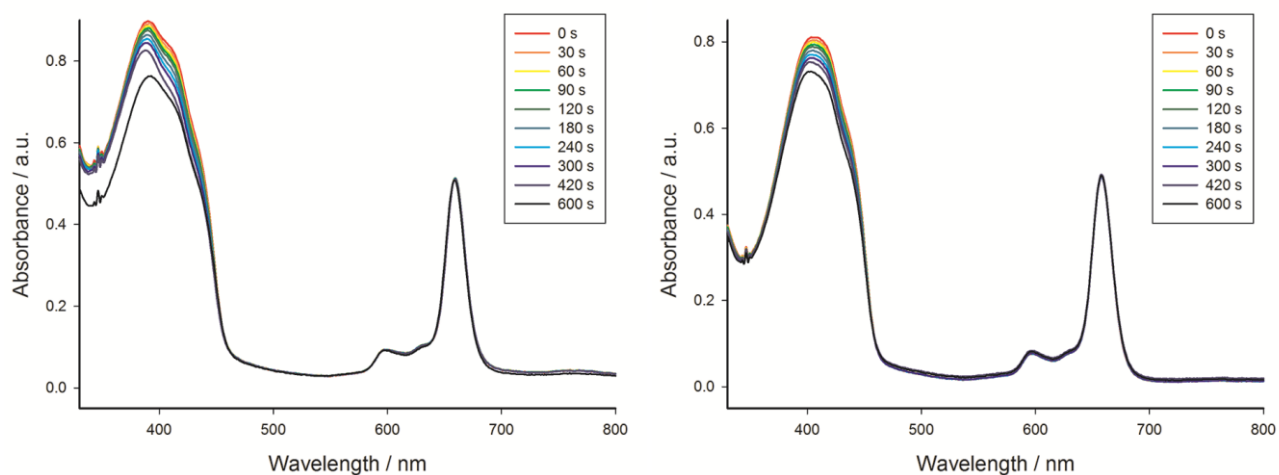

**Fig. S33.** Changes in the UV-vis spectra of DPBF and **6** in DMF (left) and DMSO (right) during irradiation at Q-band.

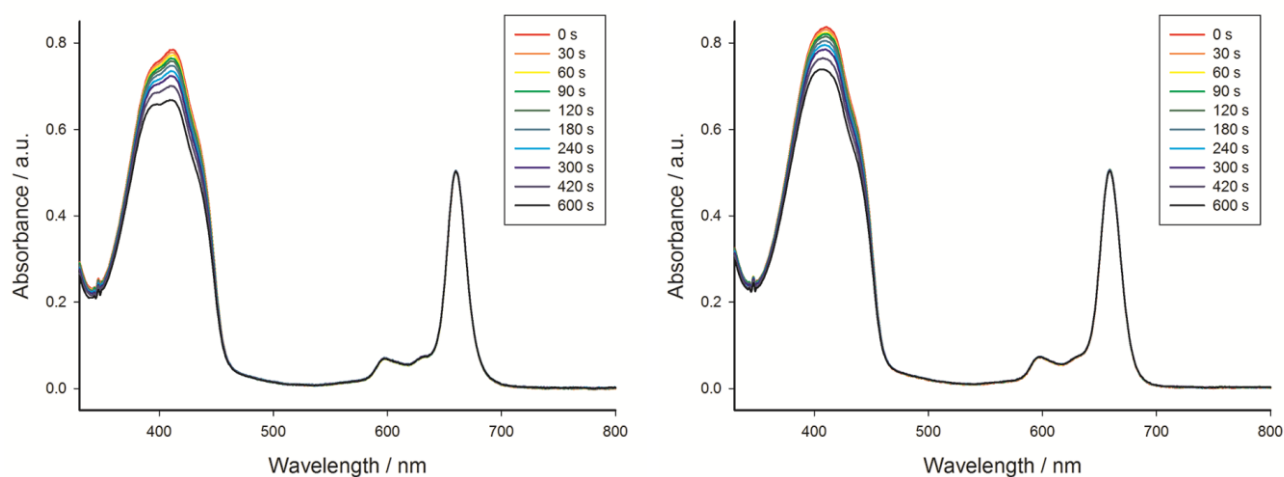

**Fig. S34.** Changes in the UV-vis spectra of DPBF and **7** in DMF (left) and DMSO (right) during irradiation at Q-band.

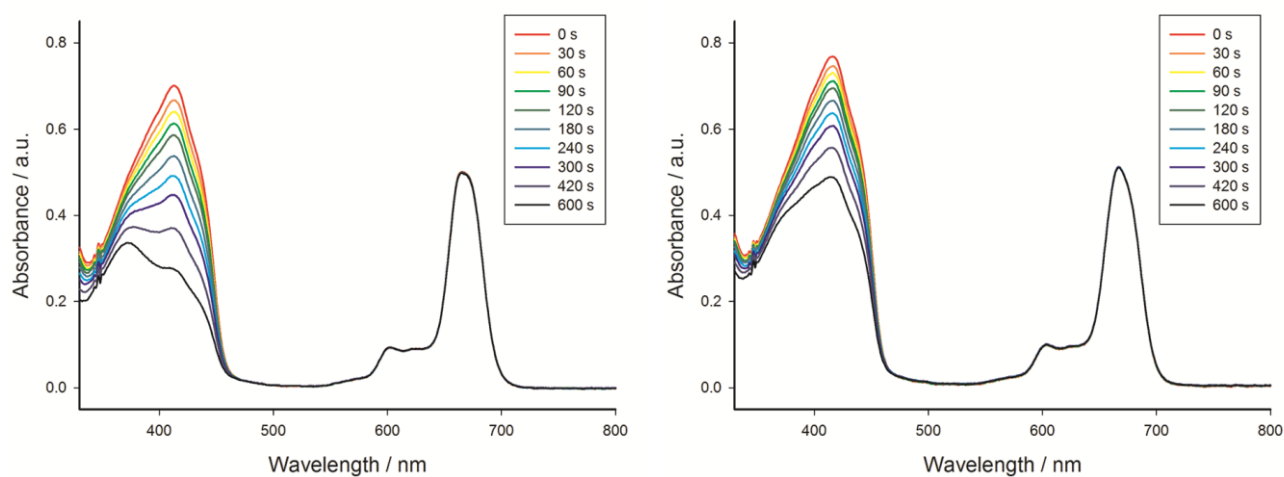

**Fig. S35.** Changes in the UV-vis spectra of DPBF and **8** in DMF (left) and DMSO (right) during irradiation at Q-band.

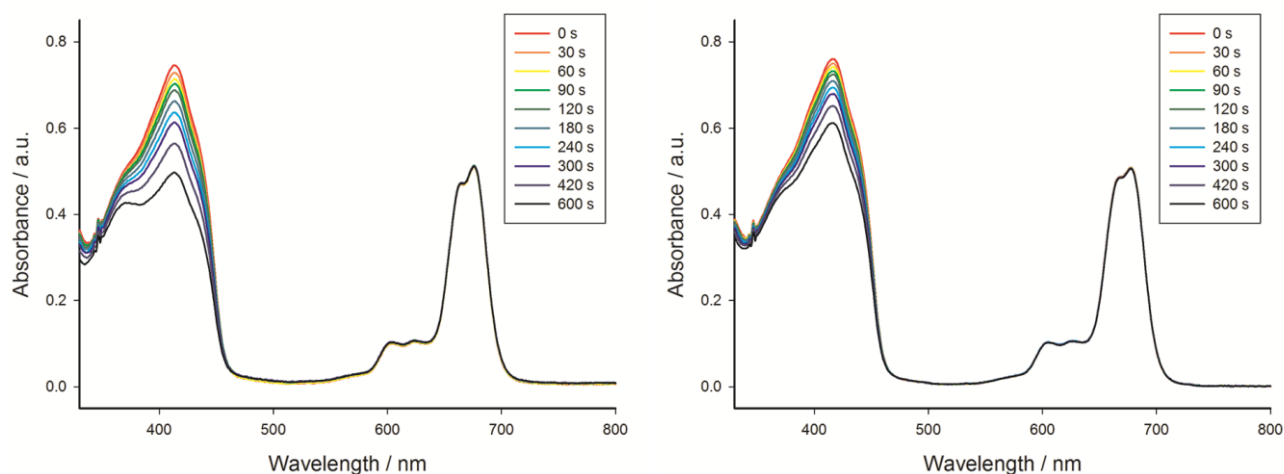

**Fig. S36.** Changes in the UV-vis spectra of DPBF and **9** in DMF (left) and DMSO (right) during irradiation at Q-band.

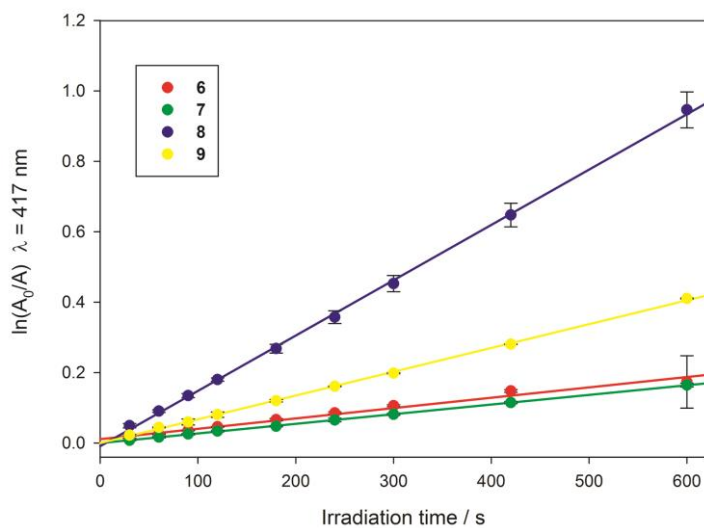

**Fig. S37.** First-order plots for the oxidation of diphenylisobenzofuran (DPBF) during irradiation of porphyrzine/DPBF solutions in DMF.

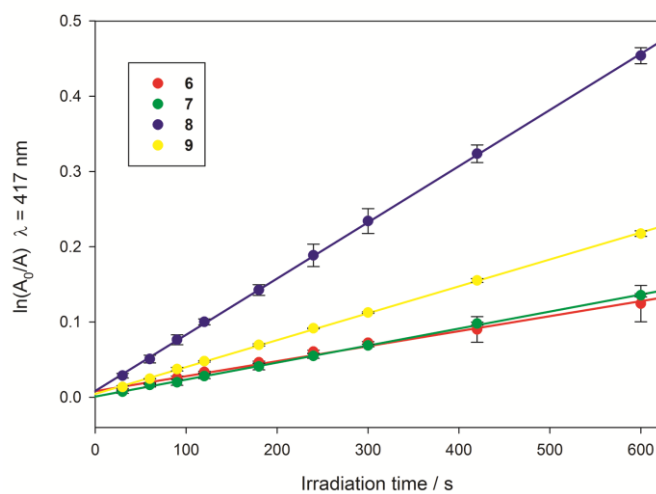

**Fig. S38.** First-order plots for the oxidation of diphenylisobenzofuran (DPBF) during irradiation of porphyrzine/DPBF solutions in DMSO.

## Fluorescence spectra

Steady state fluorescence quantum yields were measured in solutions, using JASCO FP-6200 and 1 cm-thick-cells. Absorbance of the solution was kept below 0.1 at the maximum of Q-band, in order to avoid reabsorption of the emitted fluorescence.

Quantum yields were calculated according to equation:

$$\Phi_F = \Phi_F^{st} \frac{\int F_X (1 - 10^{-A_{st}}) (n_X)^2}{\int F_{St} (1 - 10^{-A_X}) (n_{st})^2}$$

Here,  $\int F_X$  is the area under the emission curve of the sample,  $\int F_{st}$  is the area under the emission curve of the standard,  $A_X$  and  $A_{st}$  are the absorbance of the sample and standard at the excitation wavelength, respectively.  $n_X$  is the solvent refractive index for the sample,  $n_{st}$  the solvent refractive index for the standard and  $\Phi_F^{st}$  is the value of the fluorescence quantum yield of the standard. Zinc(II) phtalocyanine was used as a standard, excitation wavelength was  $\lambda = 600$  nm.

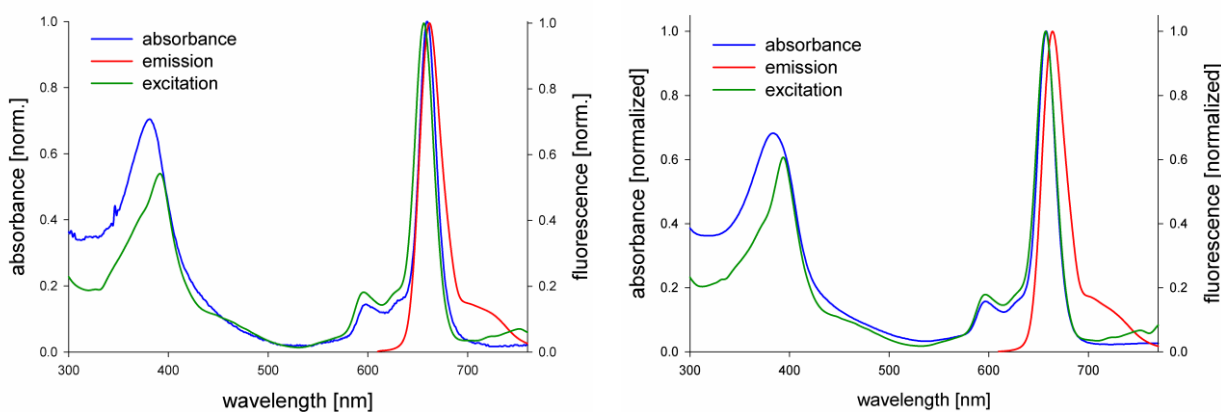

**Fig. S39.** Absorbance, emission and excitation spectra of **6** in DMF (left) and DMSO (right).

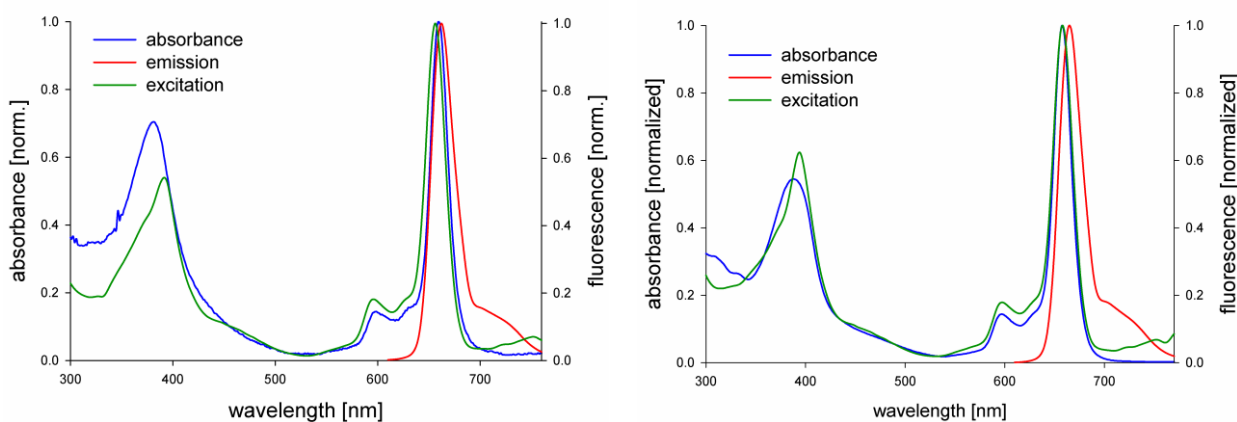

**Fig. S40.** Absorbance, emission and excitation spectra of **7** in DMF (left) and DMSO (right).

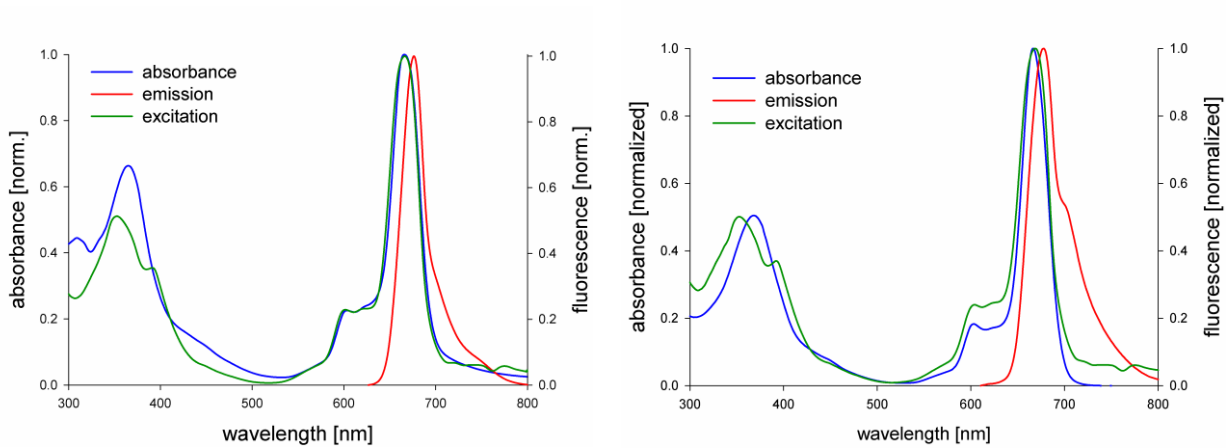

**Fig. S41.** Absorbance, emission and excitation spectra of **8** in DMF (left) and DMSO (right).

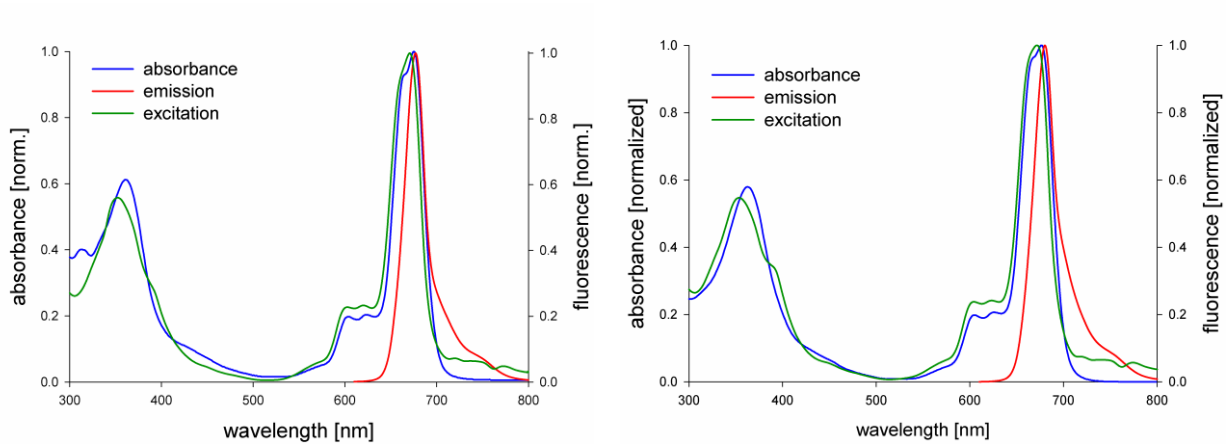

**Fig. S42.** Absorbance, emission and excitation spectra of **9** in DMF (left) and DMSO (right).

## Synthetic approaches towards porphyrazines bearing 4-(benzyloxy)phenyl substituents

2,3-Dicyanopyrazine derivative **5b**, similarly to its **5a** and **5c** analogues, was used in macrocyclisation reactions leading to porphyrazines, following general procedures described in article. Symmetrical A<sub>4</sub>-type porphyrazine **10** and tribenzoporphyrazine A<sub>3</sub>B-type **11** were obtained (Fig. S43). Formation of desired chemicals was confirmed by the means of high-resolution mass spectrometry (MALDI-TOF HRMS) – Fig S44 and S47. Low solubility of porphyrazine **10** enabled its purification by means of column chromatography. Crude product has been precipitated from reaction mixture, filtered and rinsed with: CH<sub>2</sub>Cl<sub>2</sub>, THF, ethyl acetate and acetone. Obtained green powder was subsequently subjected to NMR analysis, using DMSO-d<sub>6</sub> as a solvent. Slightly better solubility was observed for porphyrazine **11**. Crude product was chromatographed on silica gel using DCM, hexanes/ethyl acetate (7:2) and CH<sub>2</sub>Cl<sub>2</sub>/MeOH (200:1). Subsequently, obtained product was analyzed by means of NMR, using pyridine-d<sub>5</sub> as a solvent. In both cases, strong tendency to form aggregated species resulted in poorly resolved NMR spectra and therefore, uncertain results of the NMR analysis (Fig. S45, S46, S48, S49).

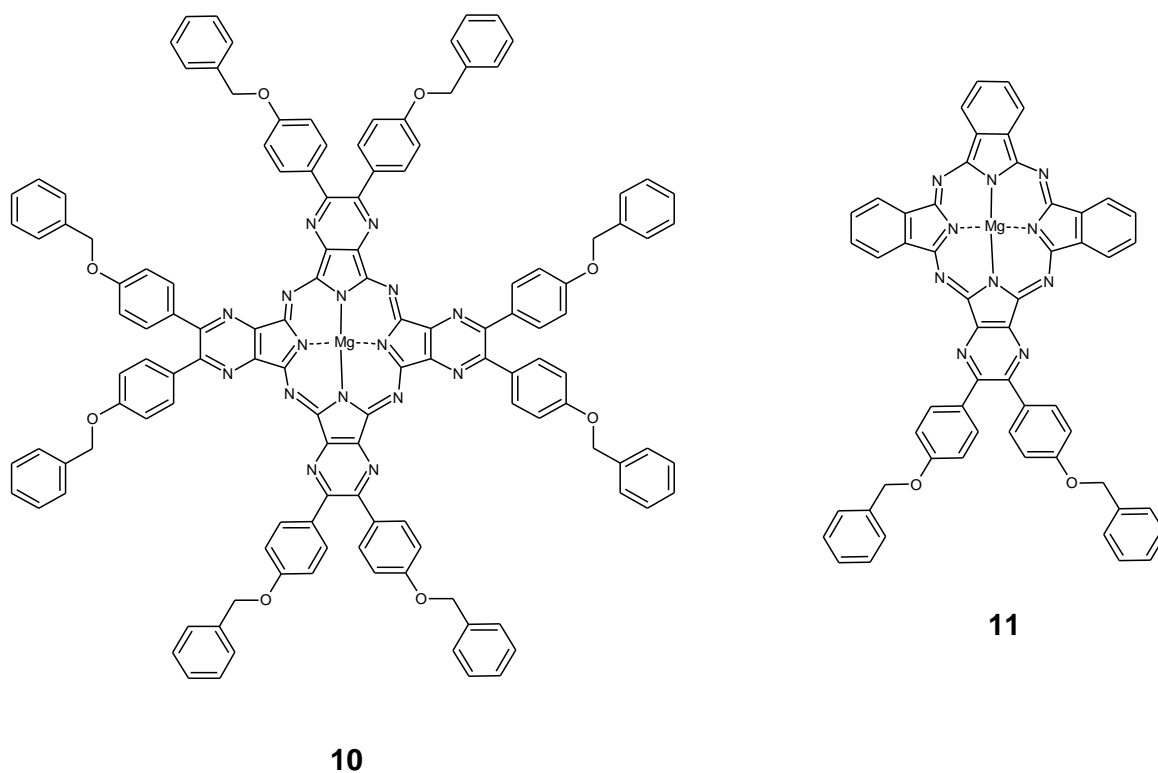

Fig. S43. Structures of porphyrazines **10** and **11** bearing 4-(benzyloxy)phenyl substituents.

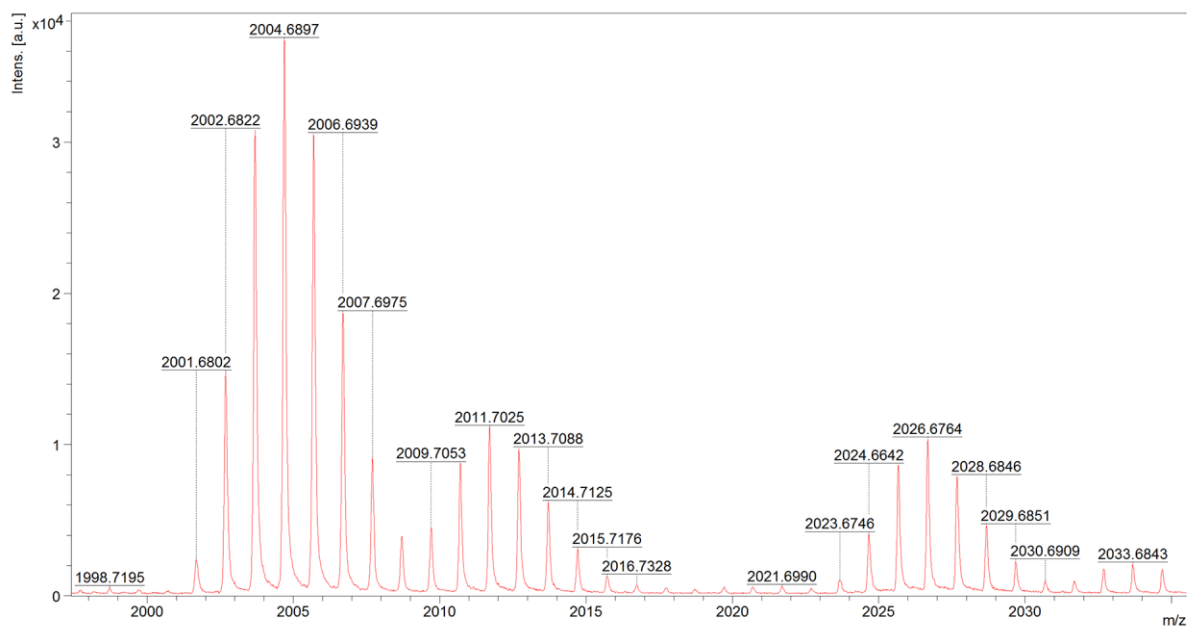

**Fig. S44.** MALDI-TOF HRMS spectrum of **10**. Calculated mass for  $C_{128}H_{88}MgN_{16}O_8 [M]^+$  2001,6851, found:  $m/z$  2001,6802; for  $C_{128}H_{88}MgN_{16}NaO_8 [M+Na]^+$  2024,6749, found:  $m/z$  2024,6642.

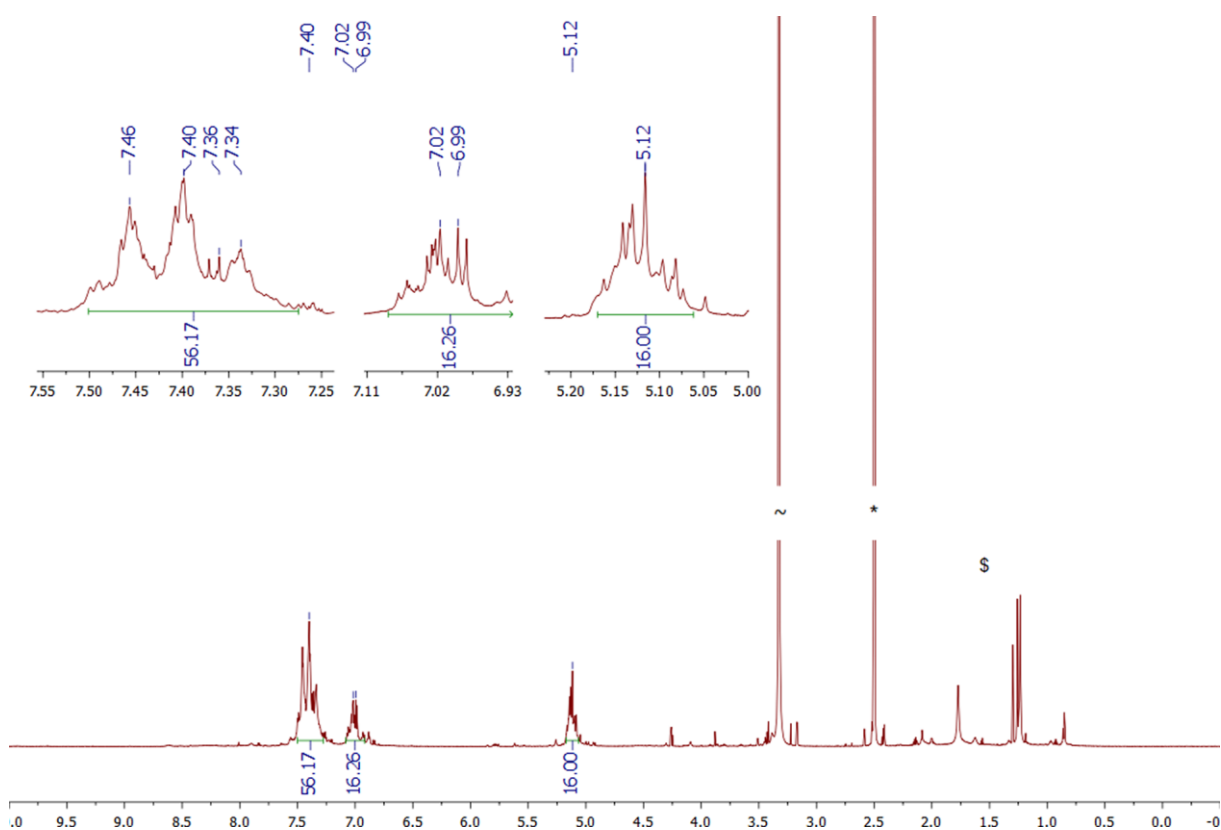

**Fig. S45.**  $^1H$  NMR spectrum of **10** (800 MHz,  $DMSO-d_6$ , 298 K). The symbols \*, ~ and \$ indicate  $DMSO-d_6$ , water and hexane residual peaks, respectively.



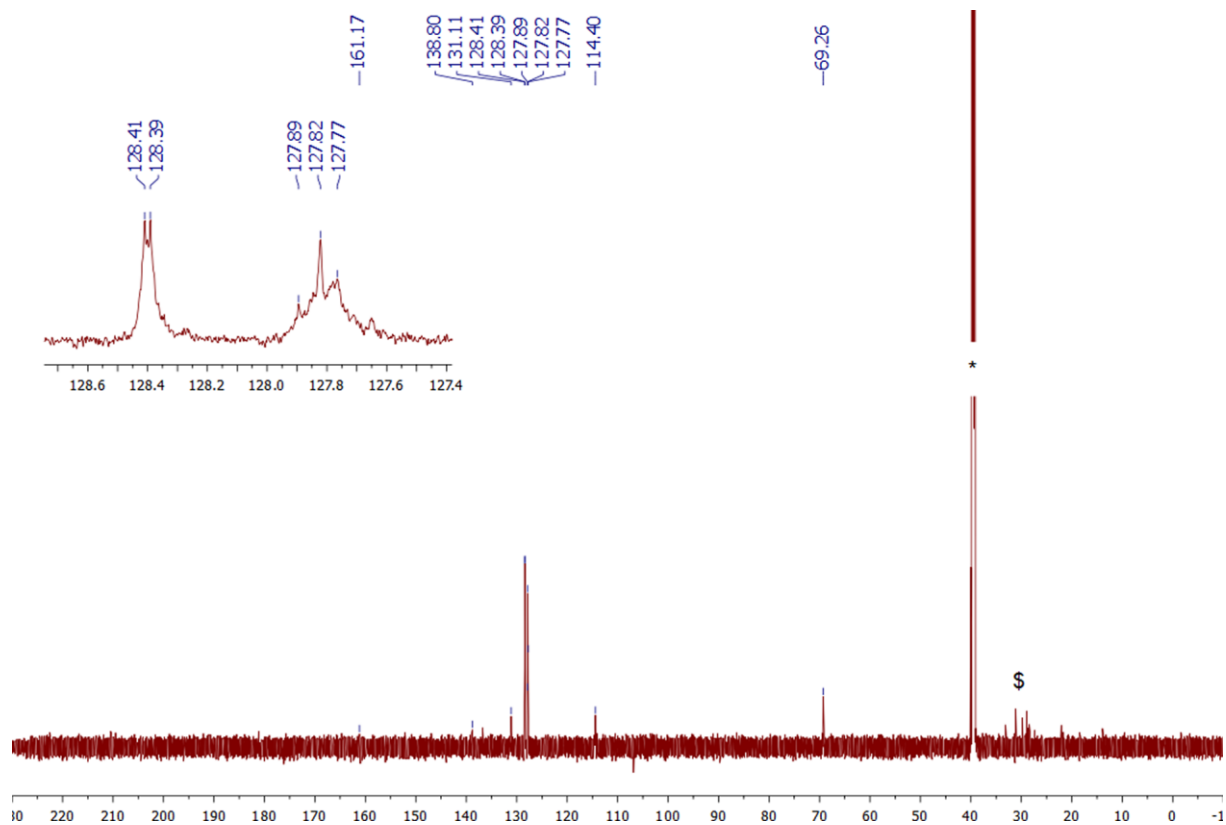

**Fig. S46.**  $^{13}\text{C}$  NMR spectrum recorded for **10** (201 MHz,  $\text{DMSO-}d_6$ , 298 K). The symbols \* and \$ indicate  $\text{DMSO-}d_6$  and hexane residual peaks, respectively.

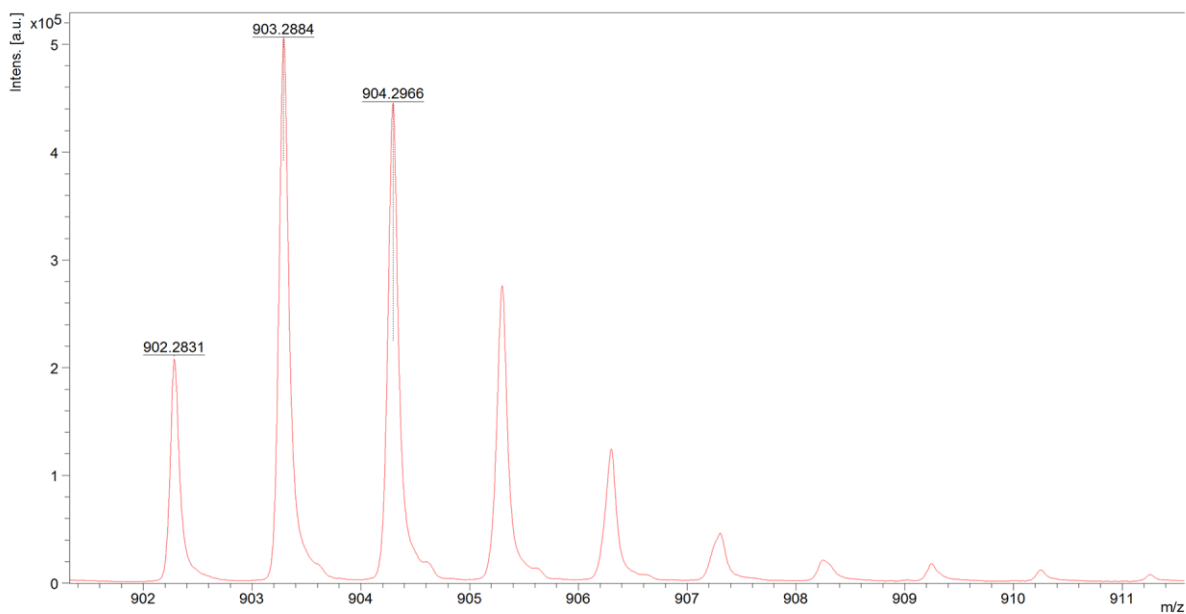

**Fig. S47.** MALDI-TOF HRMS spectrum of **11**. Calculated mass for  $C_{56}H_{35}MgN_{10}O_2$   $[M+H]^+$  903.2795, found: m/z 903.2884.

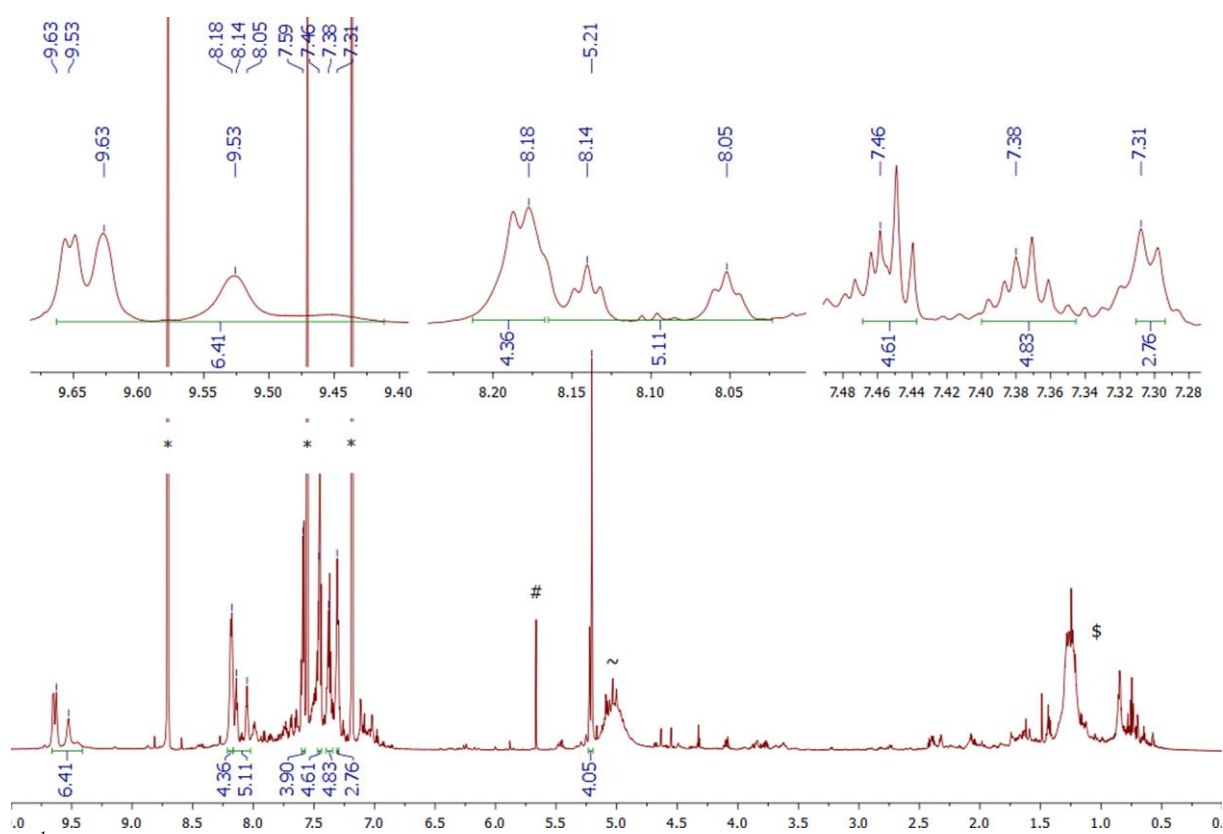

**Fig. S48.**  $^1H$  NMR spectrum of **11** (800 MHz, pyridine- $d_5$ , 298 K). The symbols \*, #, ~ and \$ indicate pyridine- $d_5$ ,  $CH_2Cl_2$ , water and hexane residual peaks, respectively.

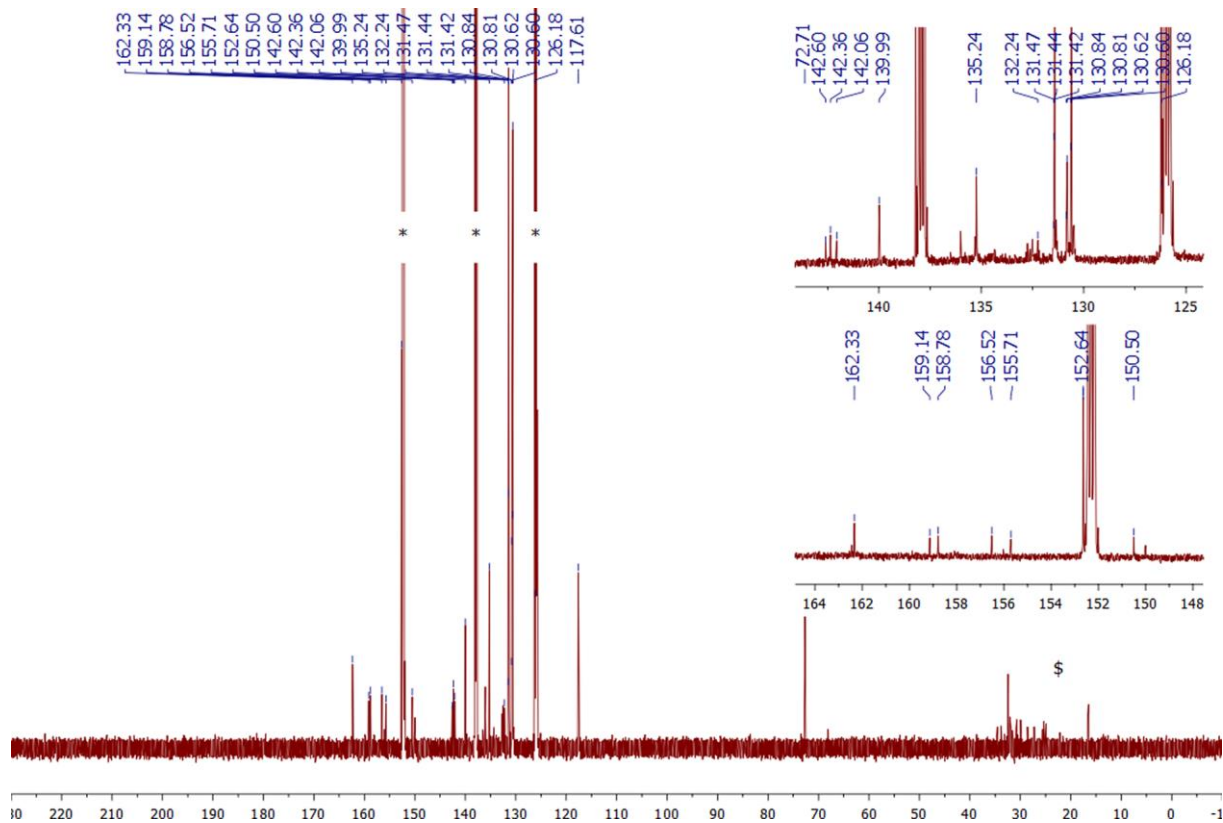

**Fig. S49.**  $^{13}\text{C}$  NMR spectrum recorded for **11** (201 MHz, pyridine- $d_5$ , 298 K). The symbols \* and \$ indicate pyridine- $d_5$  and hexane residual peaks, respectively.
